# Supplementary material
Source: PubMed Central journal article supplement (PMC11192564)
Supplement: NIHMS1944471-supplement-1.pdf [file NIHMS1944471-supplement-1.pdf]

Data S1. Original Images of Representative Western blots, related to Figure 1-Figure 6 and Figure S1-Figure S6

Figure. 1A

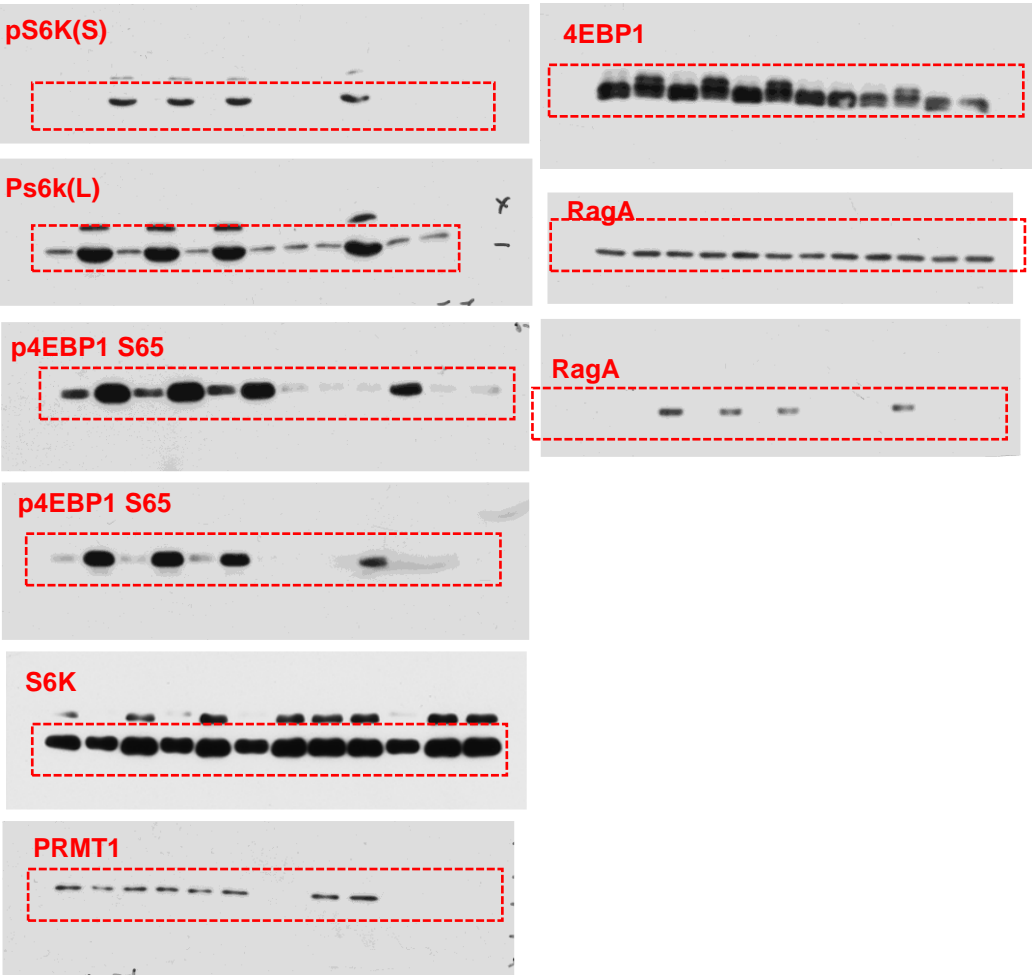

Figure. 1D

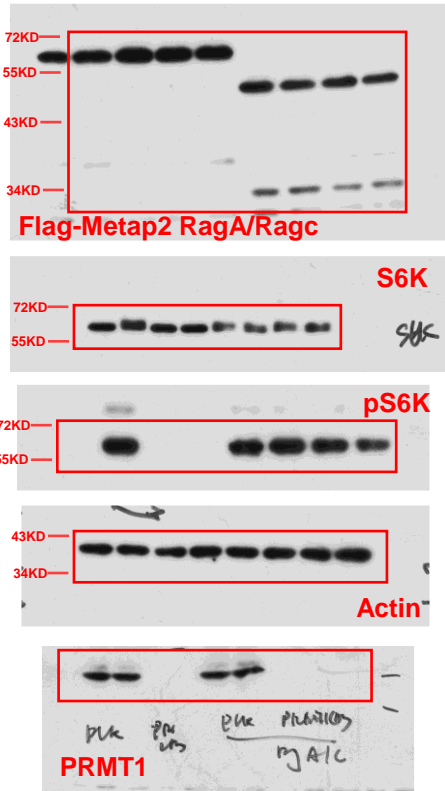

Figure. 1E

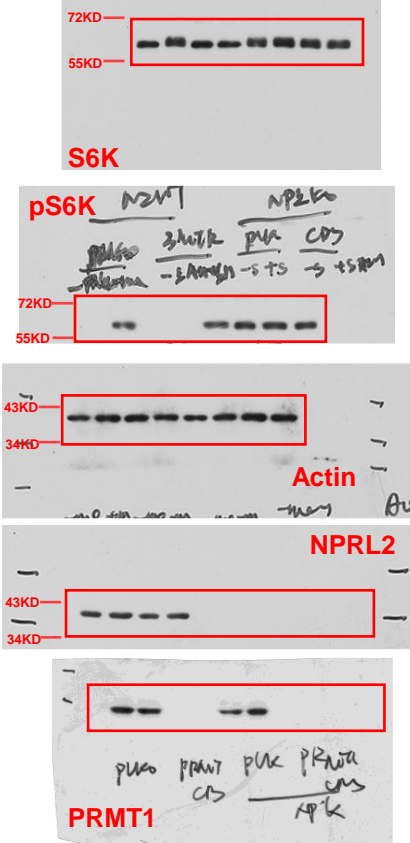

Figure. 1F

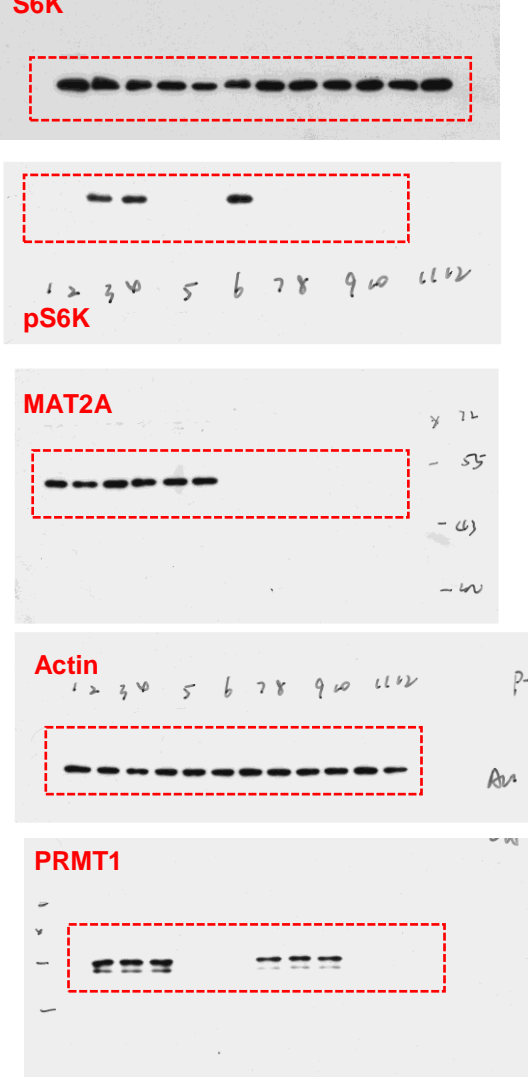

Figure. 1G

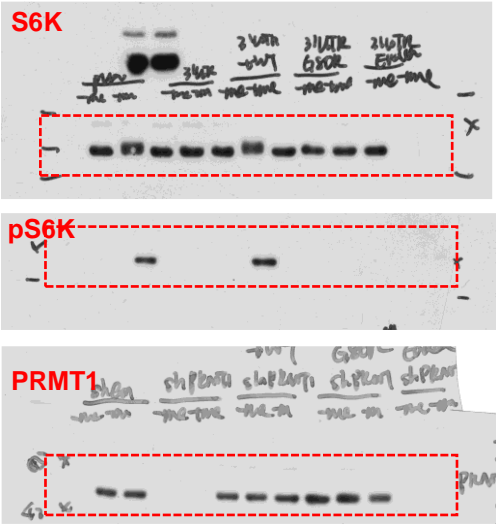

Figure. 1H

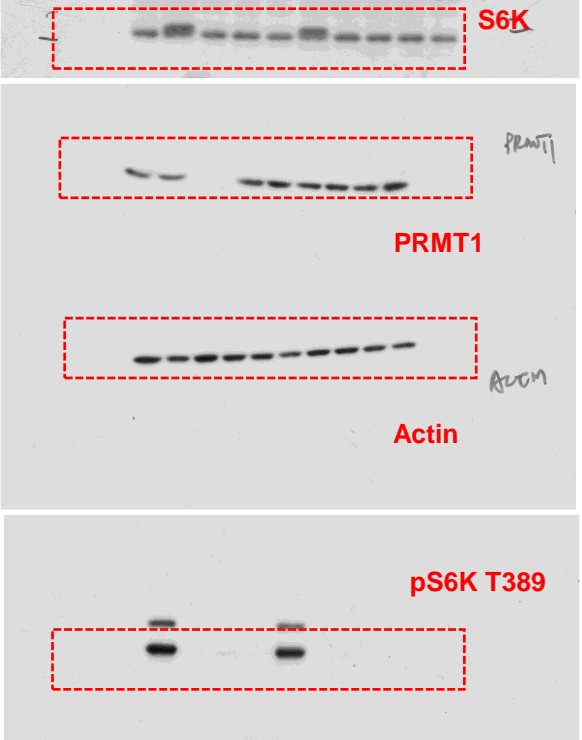

Fig.1

Figure. 2A

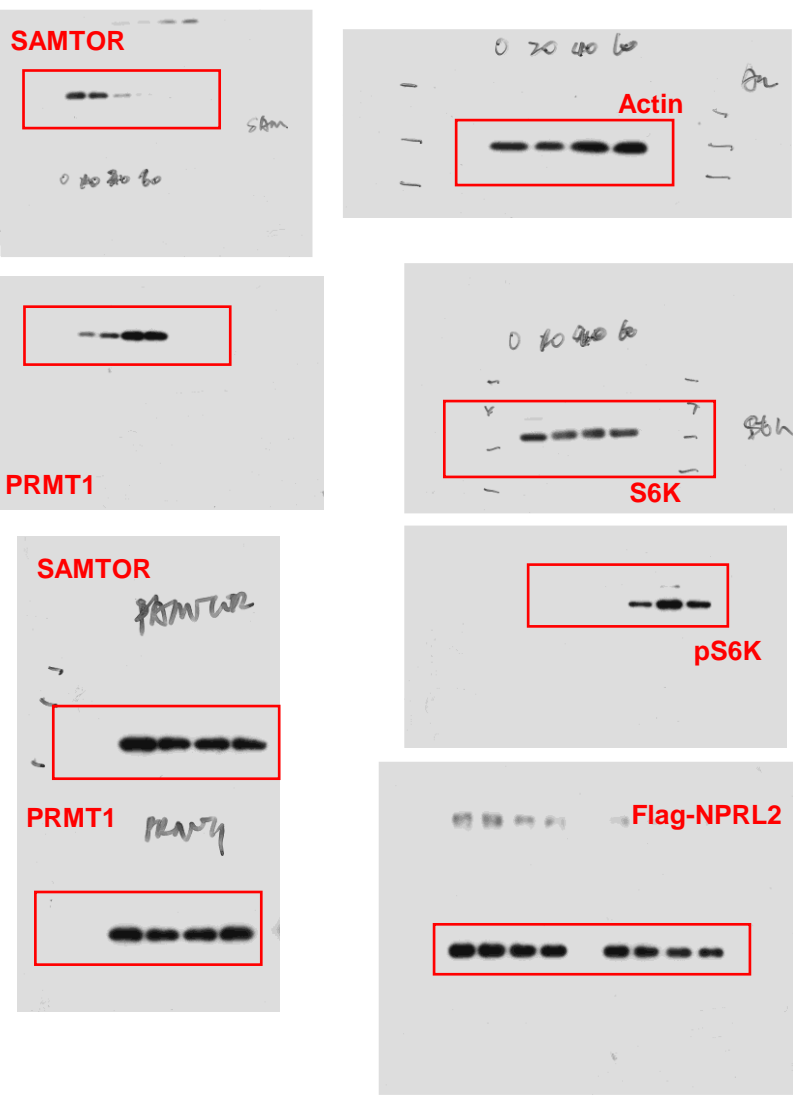

Figure. 2C

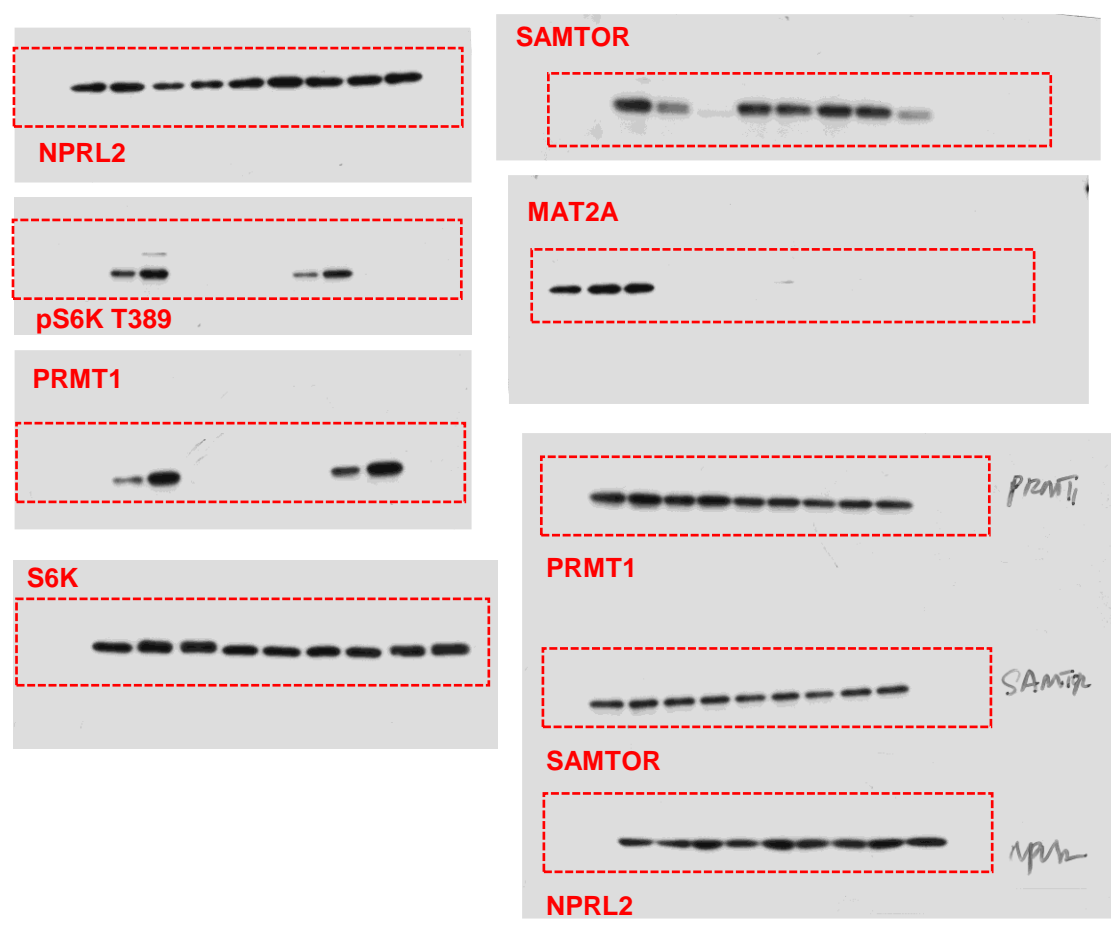

Figure. 2G

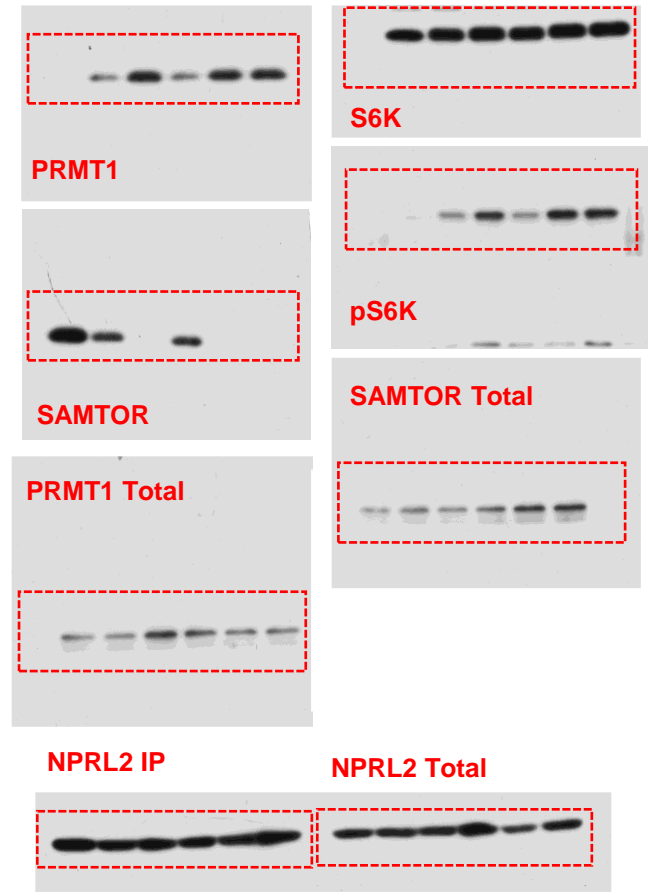

Figure. 2I

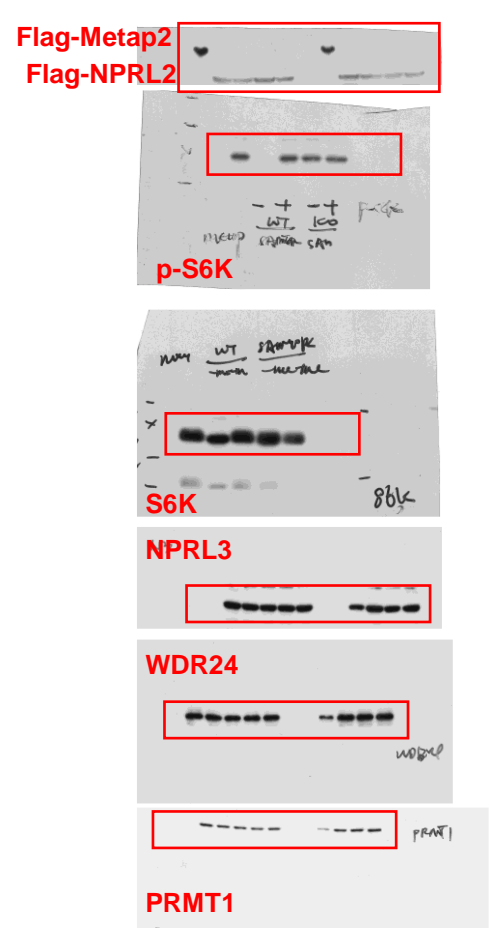

Figure. 2J

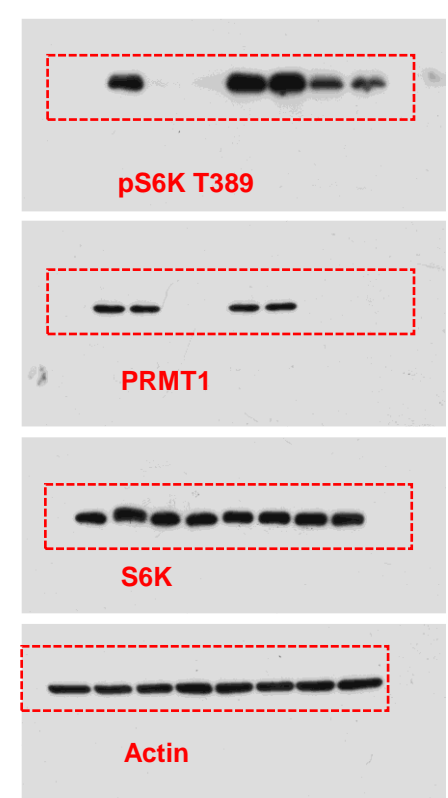

Fig.2

Figure. 3B

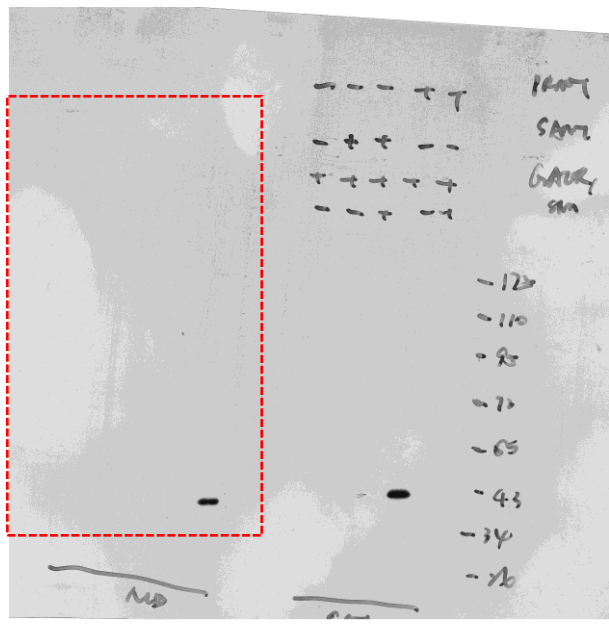

Figure. 3D

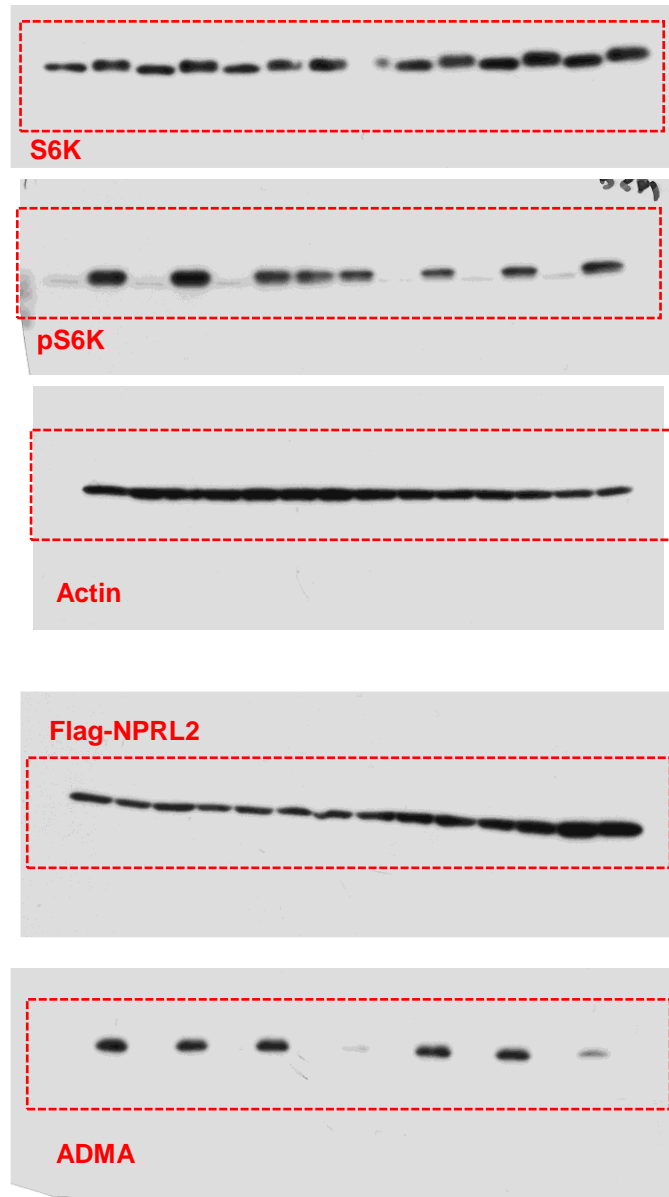

Figure. 3E

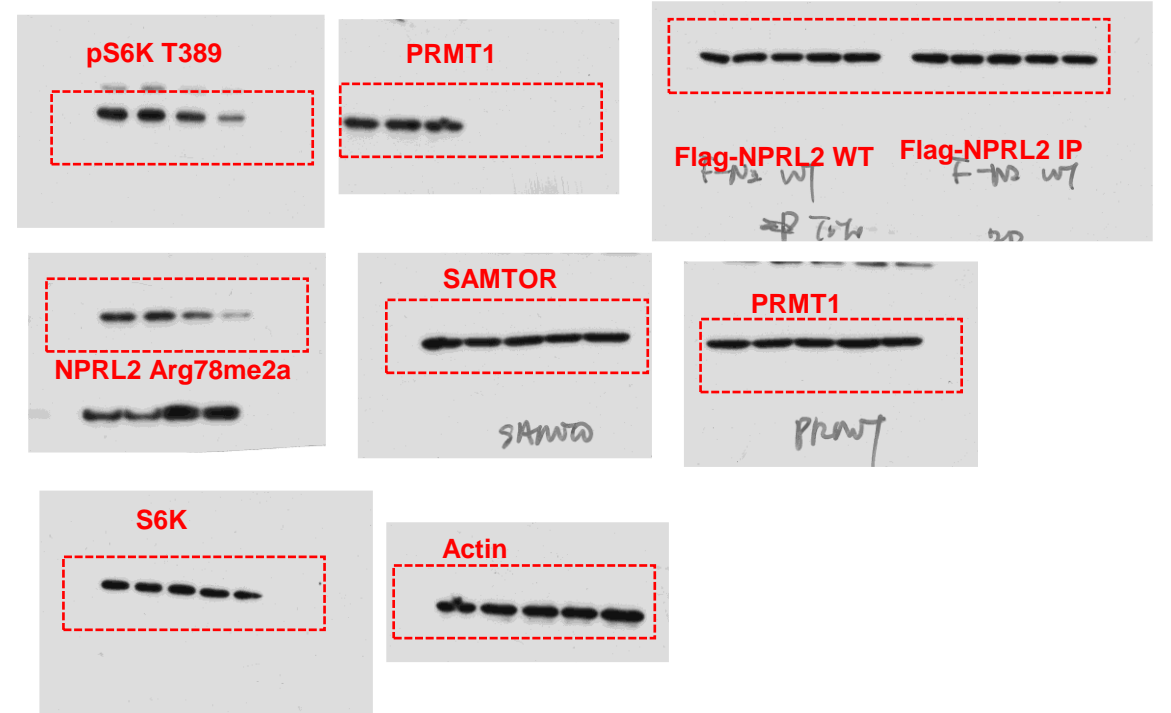

Figure. 3G

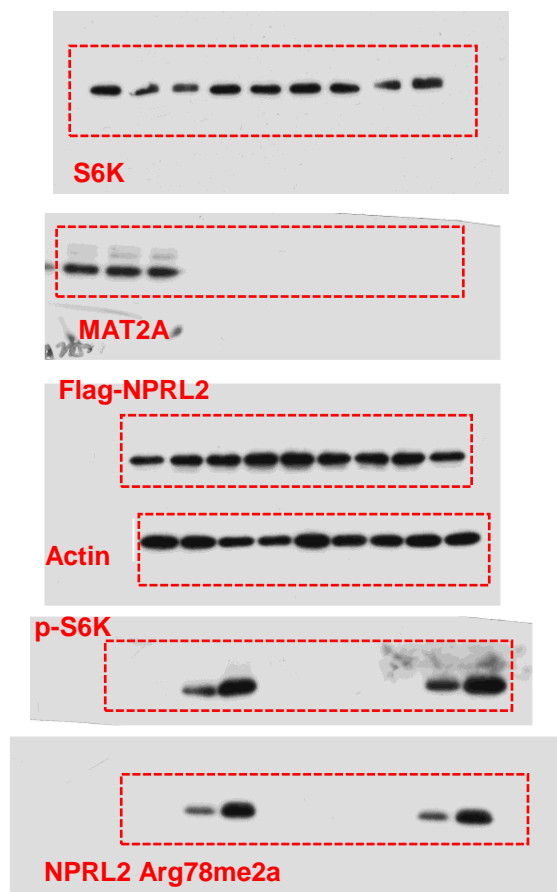

Figure. 3H

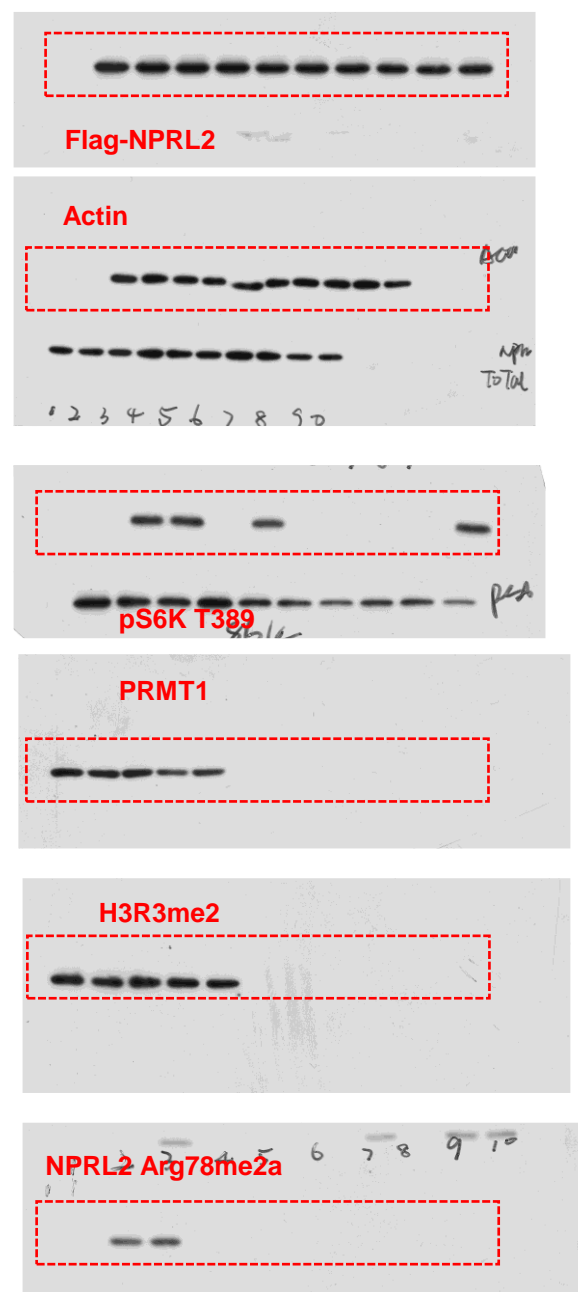

Fig.3

Figure. 4B

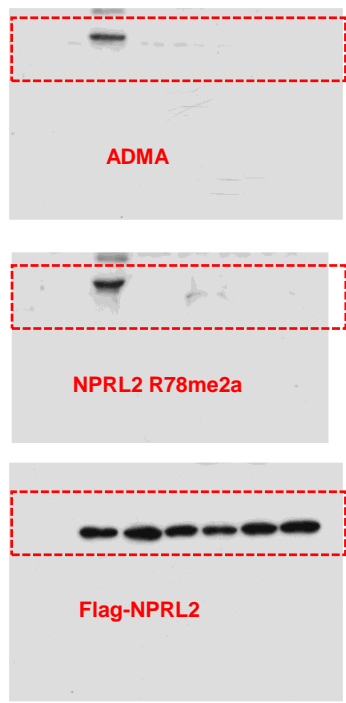

Figure. 4E

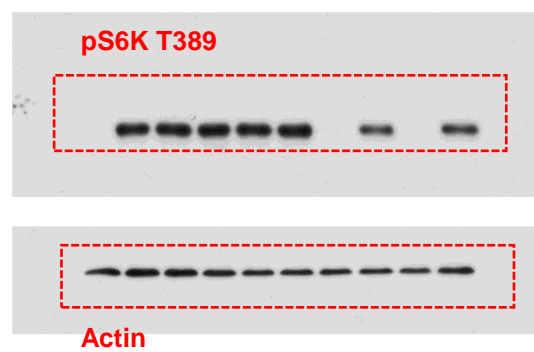

Figure. 4I

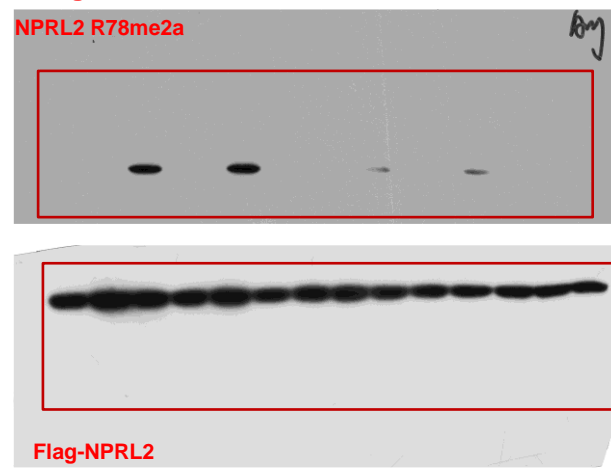

Figure. 4K

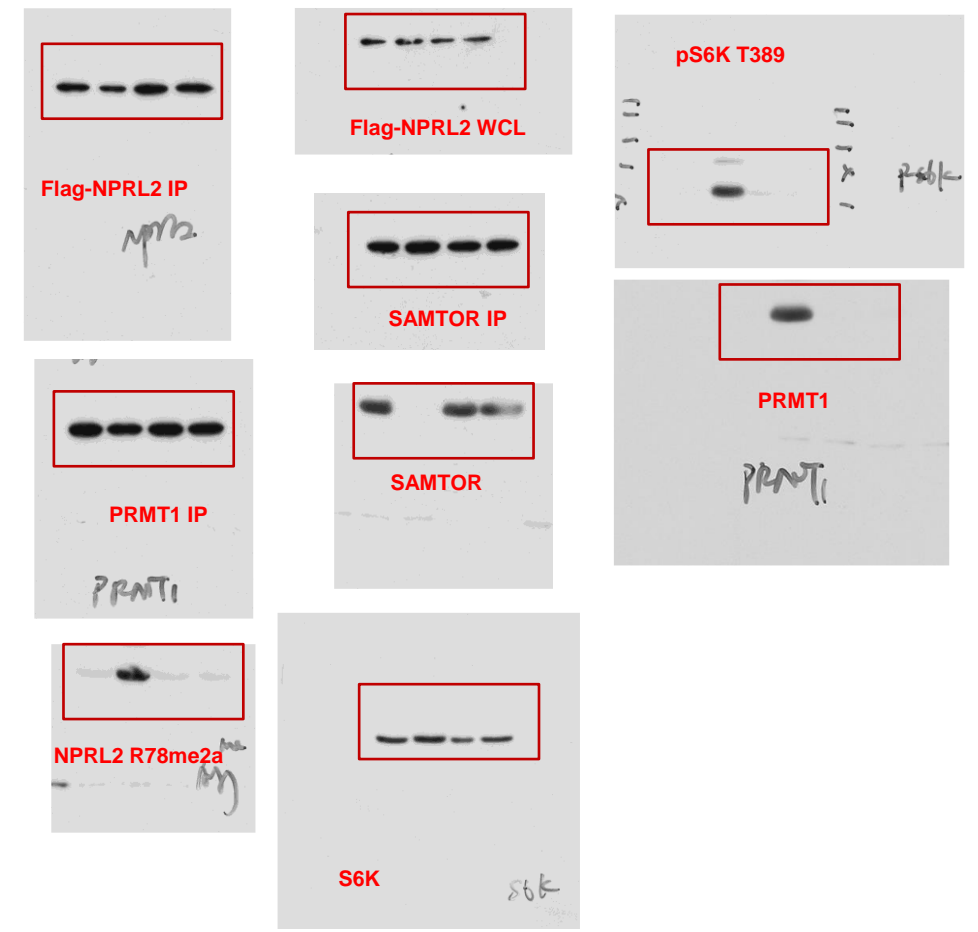

Fig.4

Figure. 5A

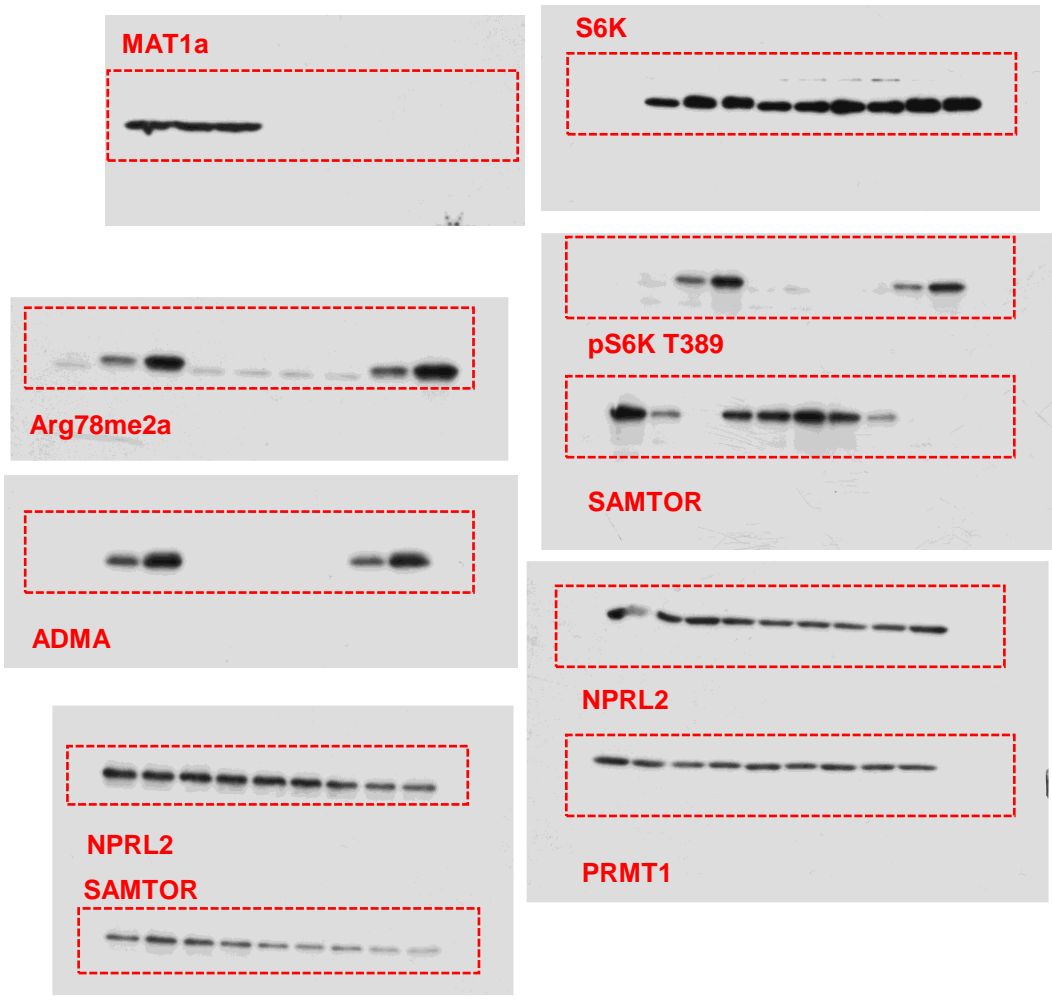

Figure. 5B

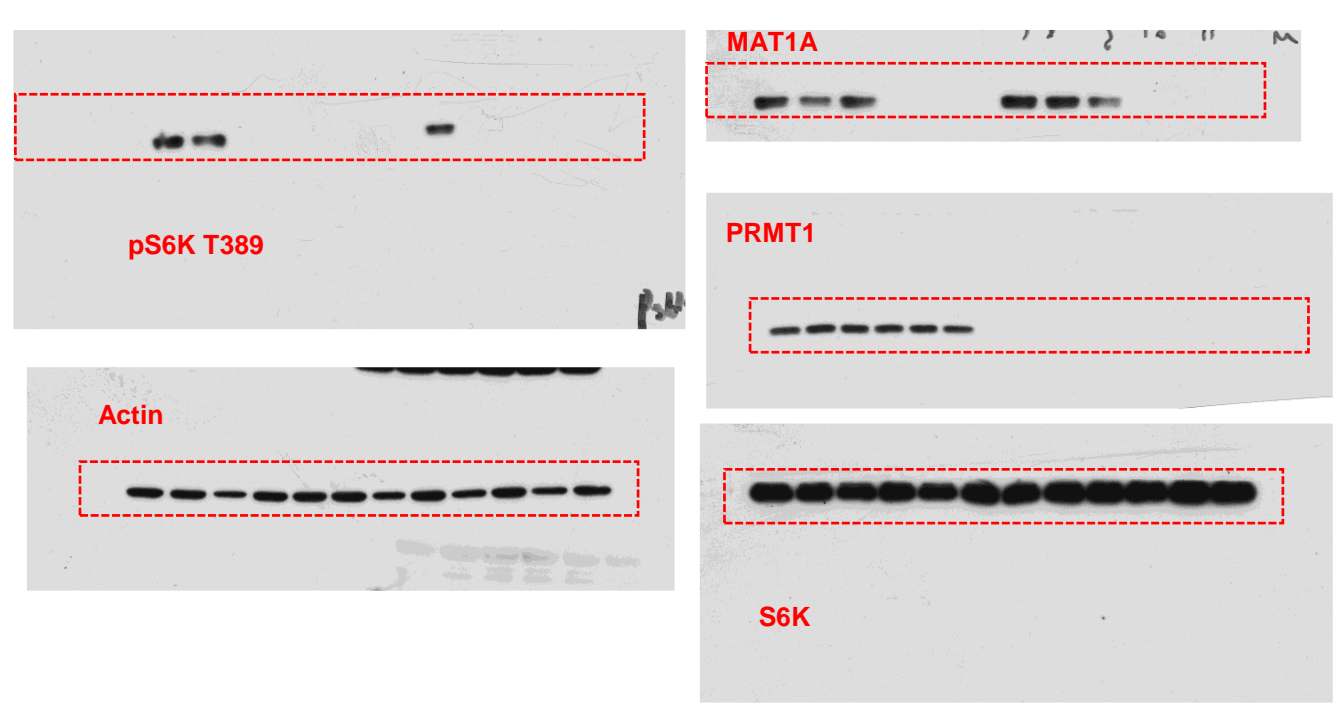

Figure. 5C

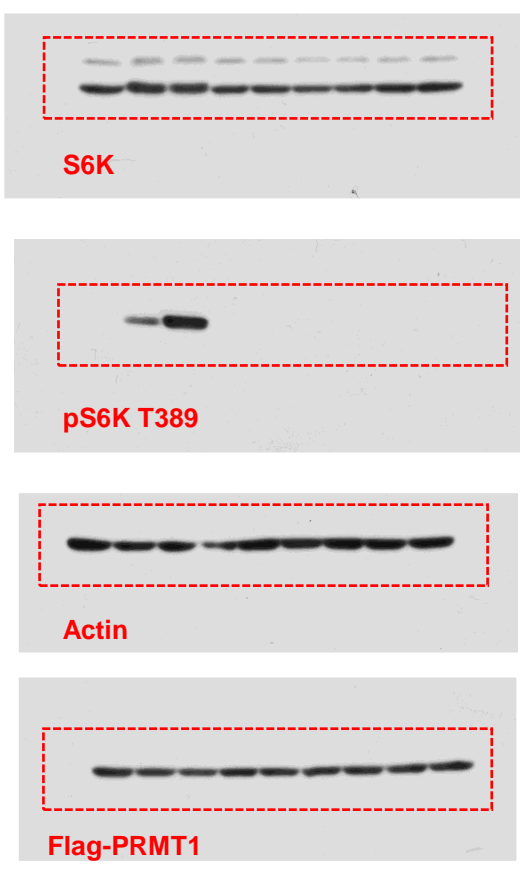

Figure. 5I

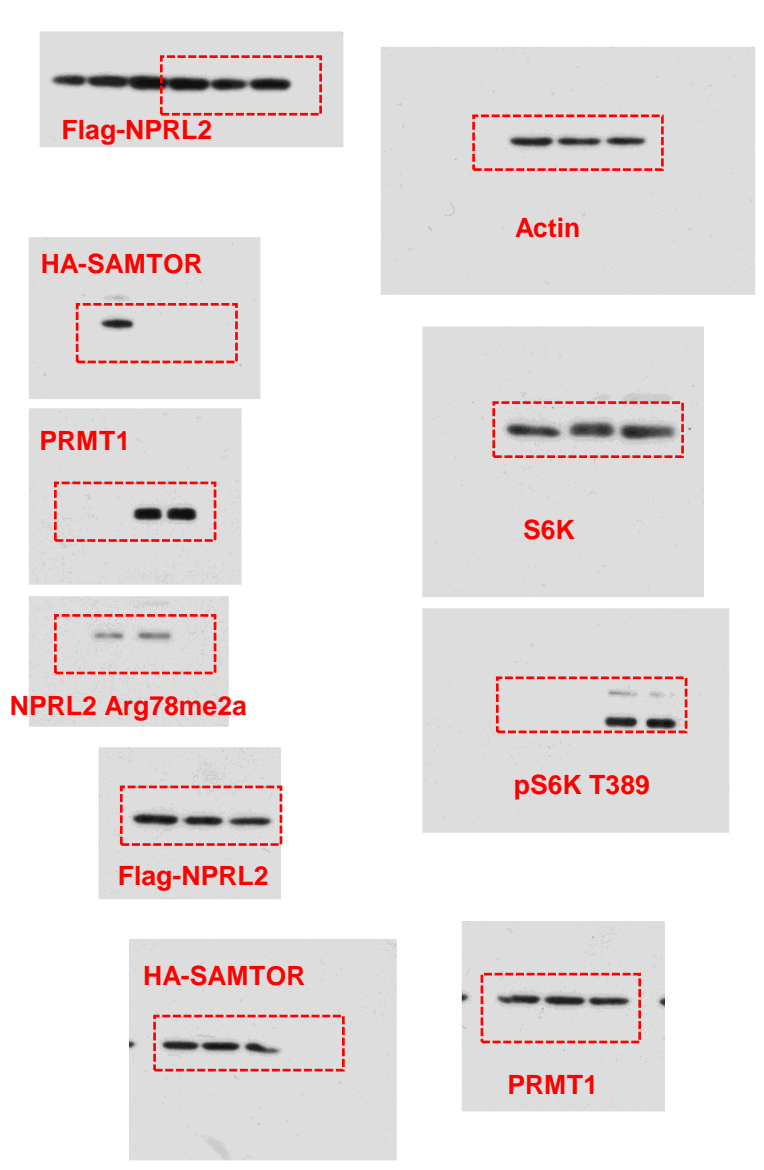

Figure. 5K

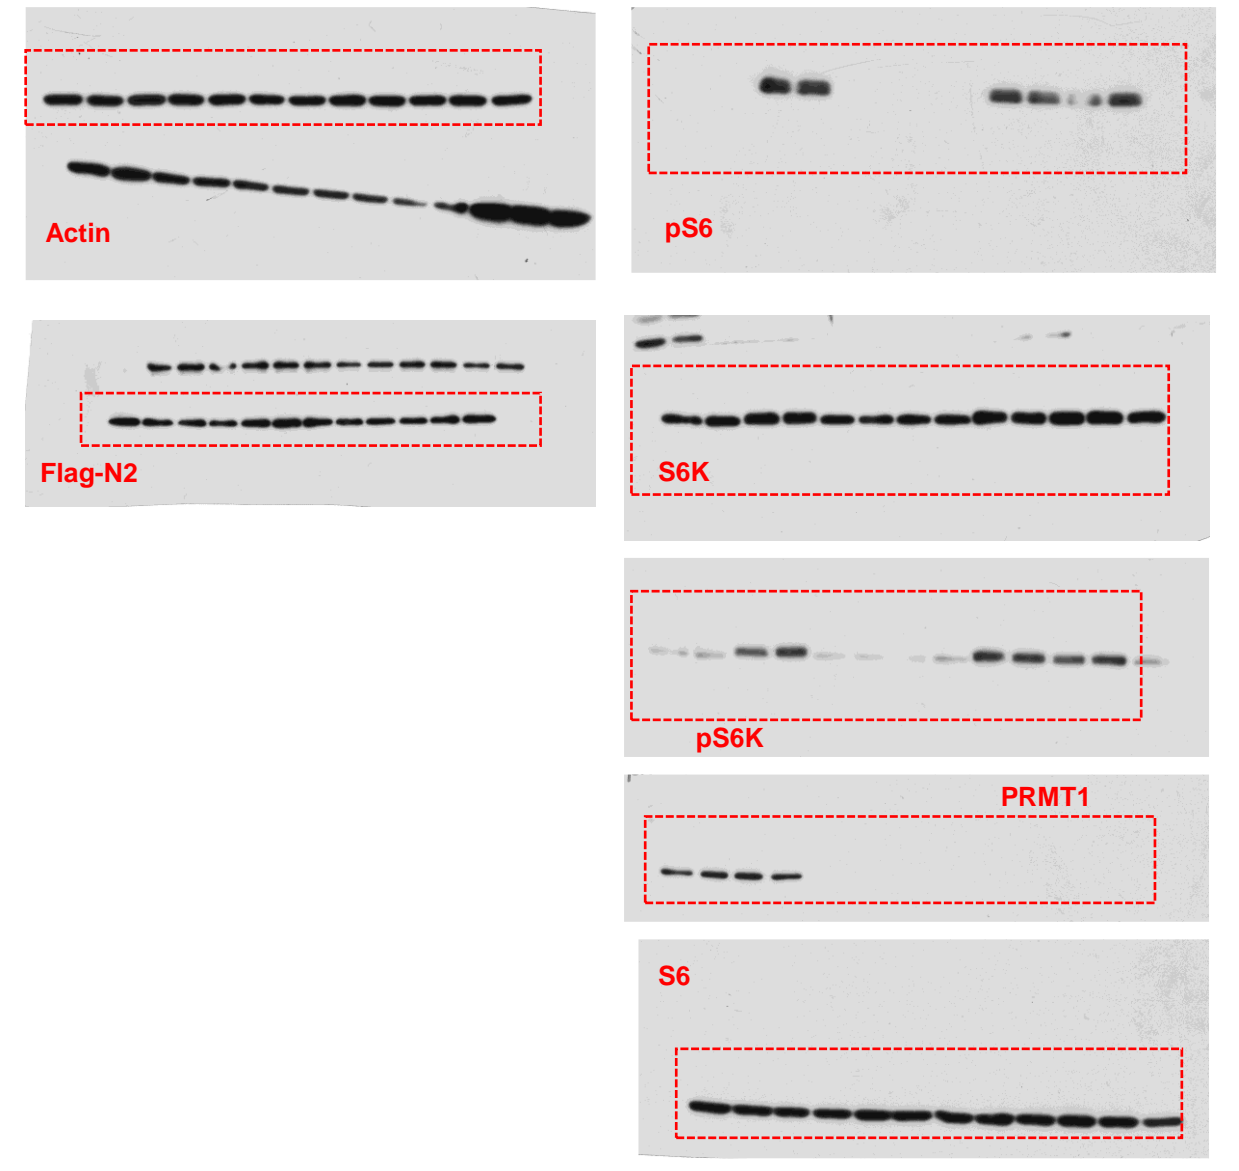

Fig.5

Figure. 6B

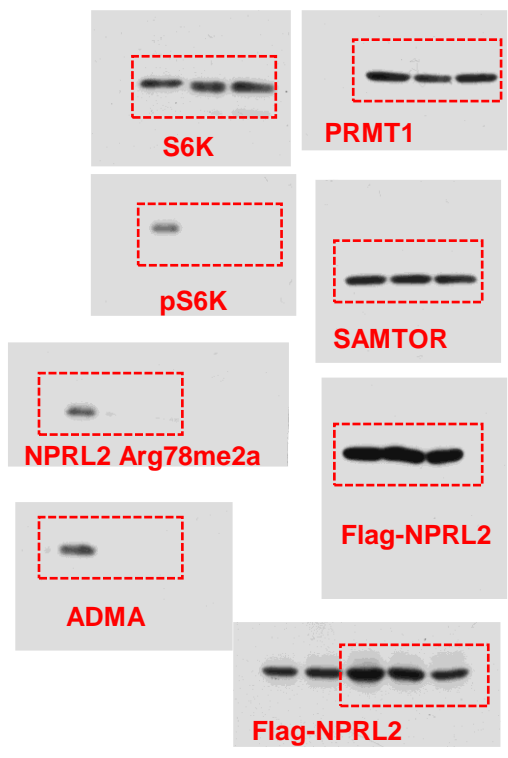

Figure. 6C

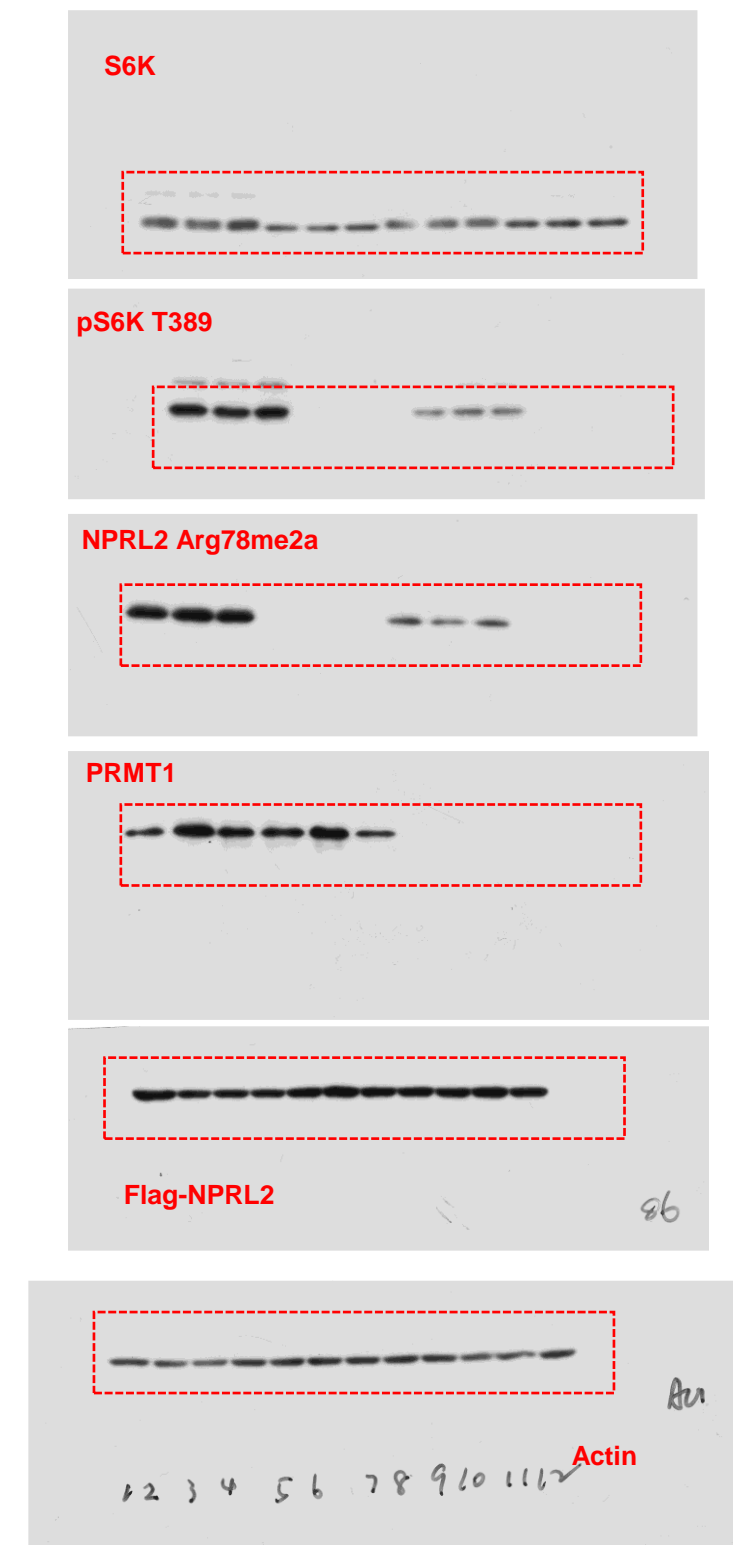

Fig.6



Figure. S1D

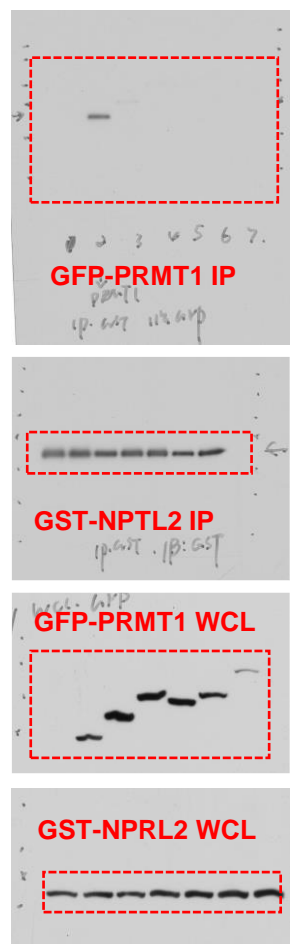

Figure. S1E

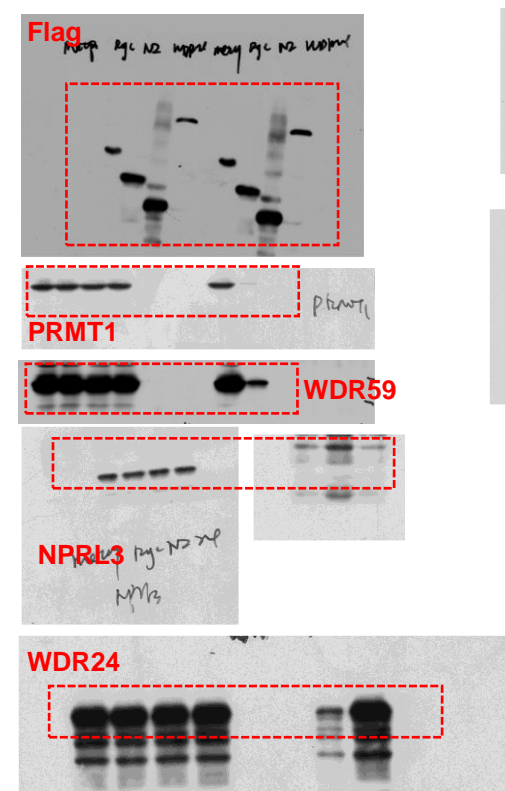

Figure. S1F

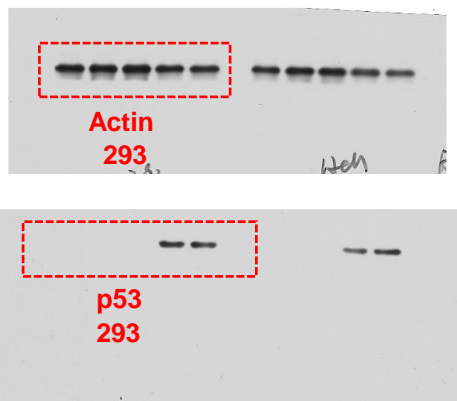

Figure. S1G

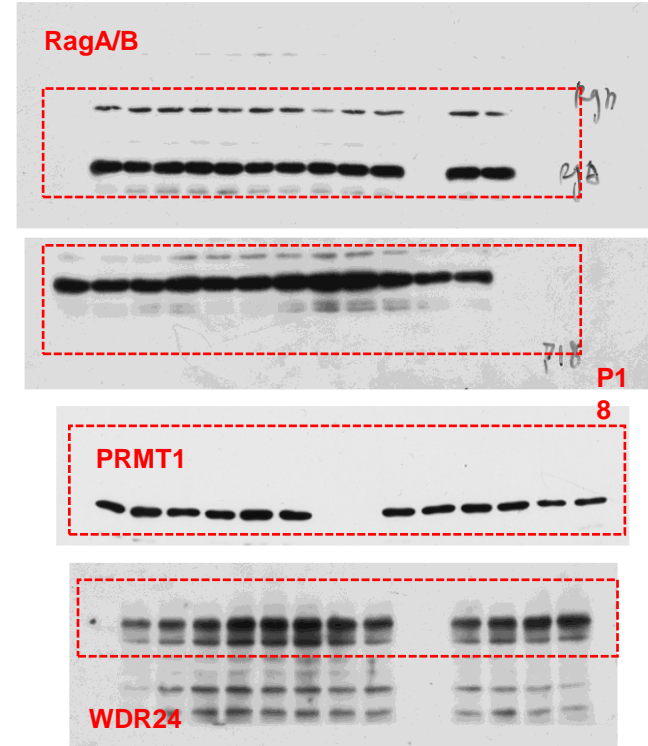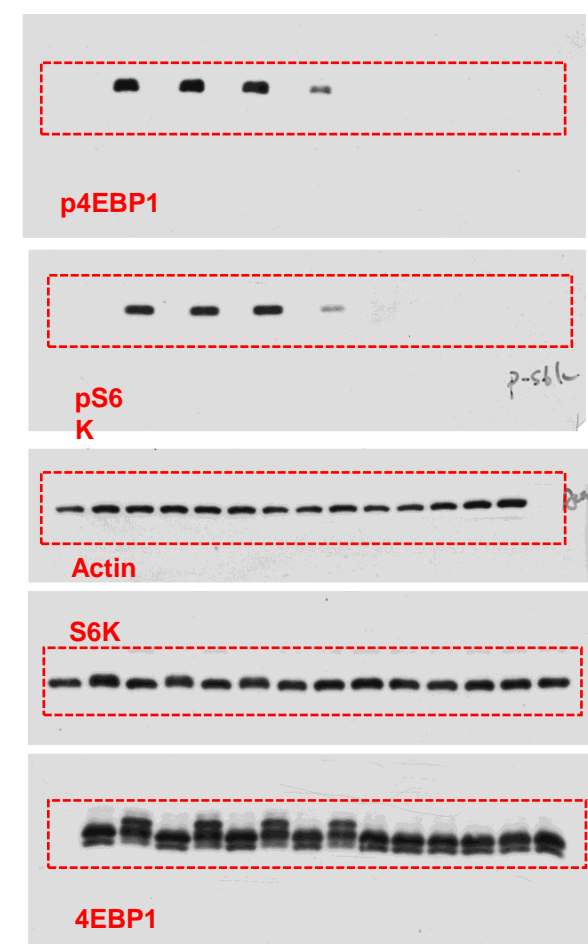

Figure. S1I

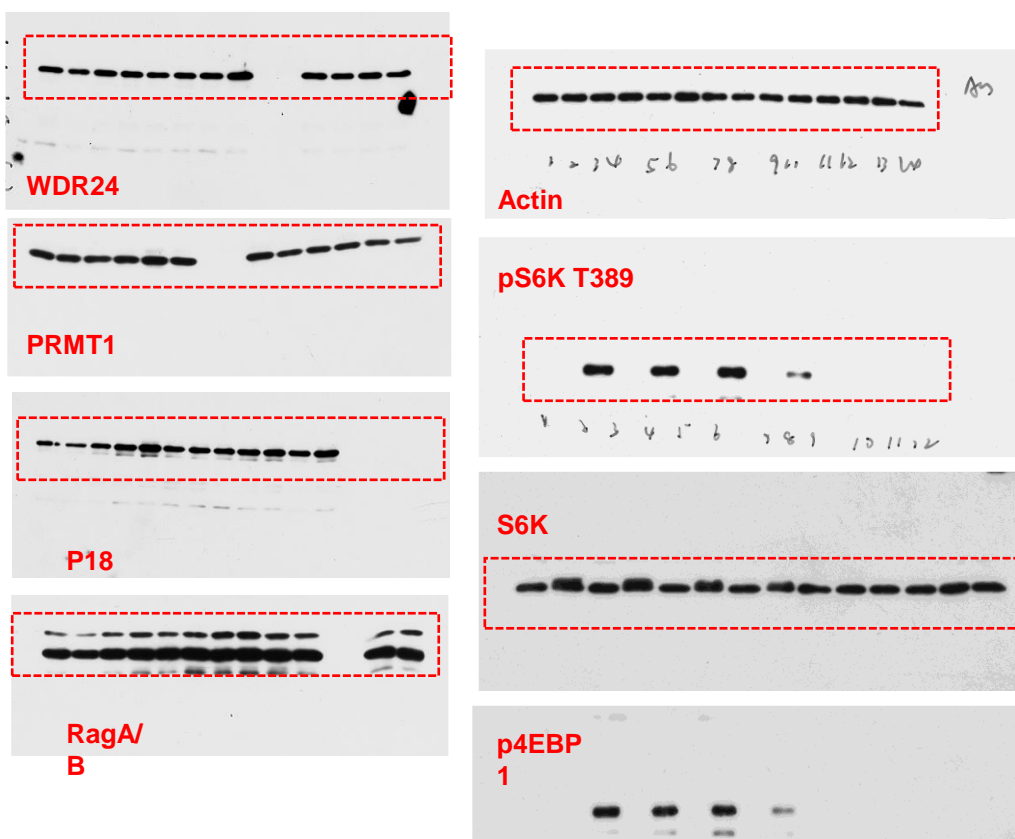

Figure. S1J

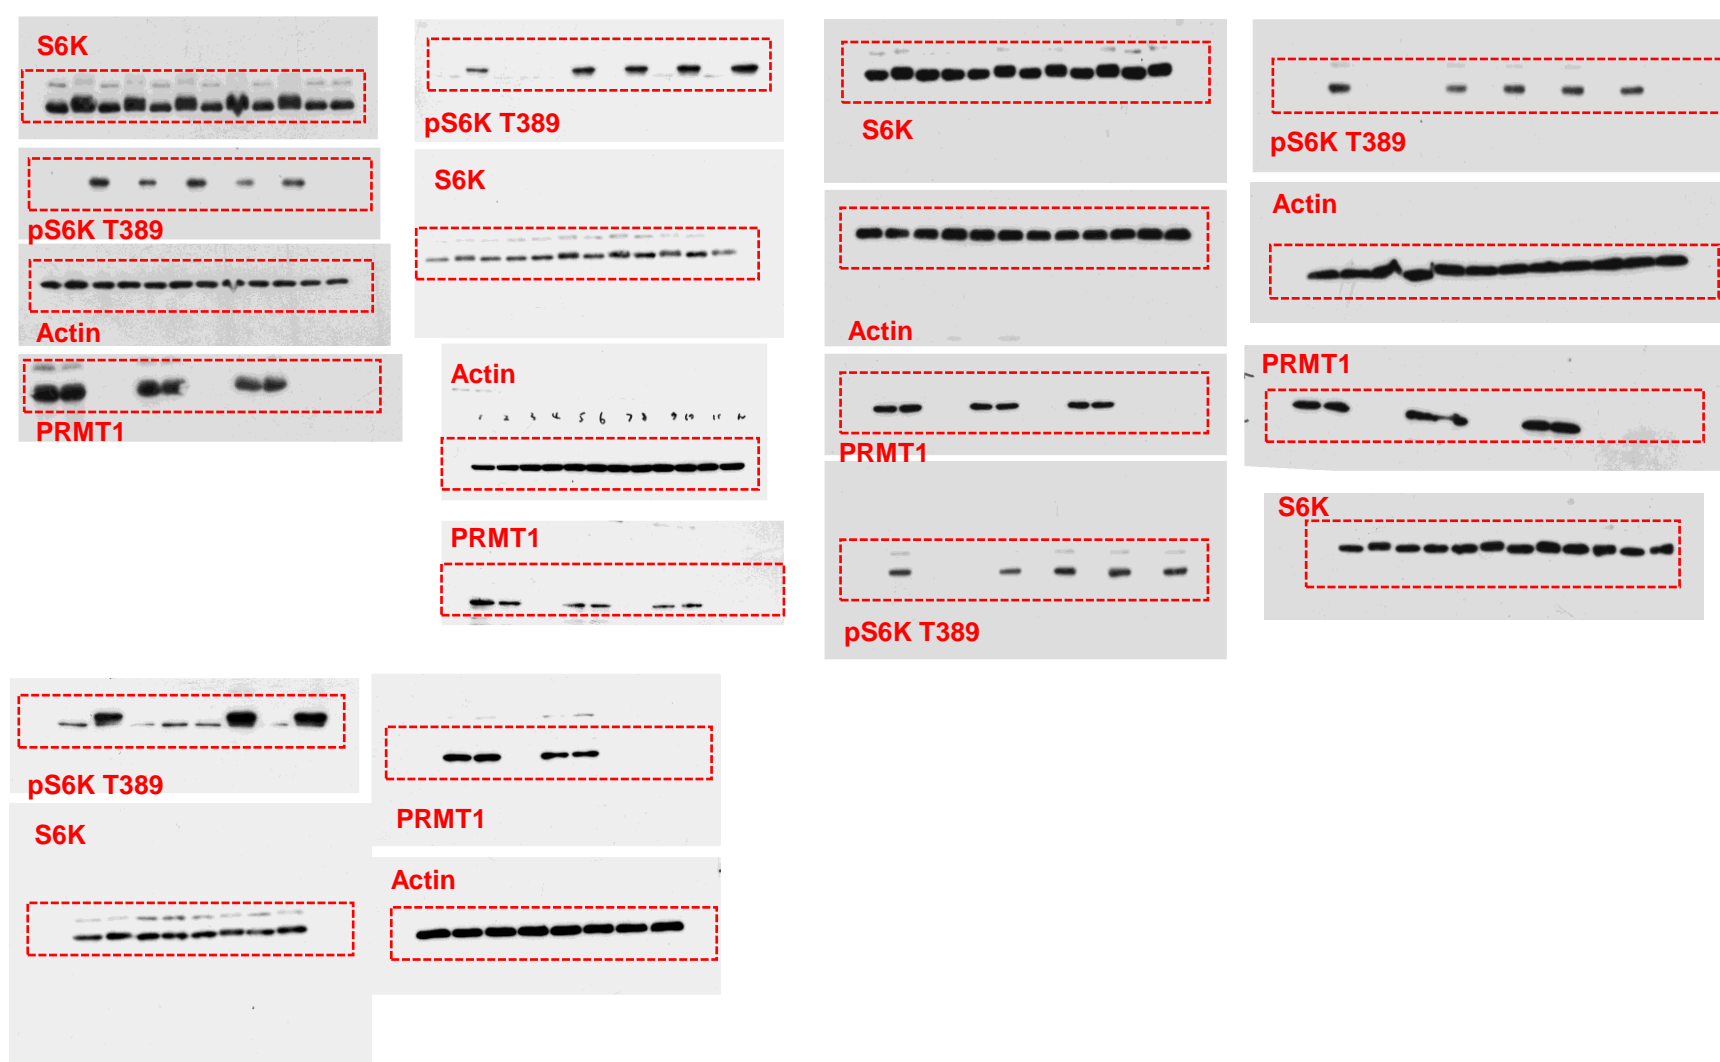

Figure. S1K

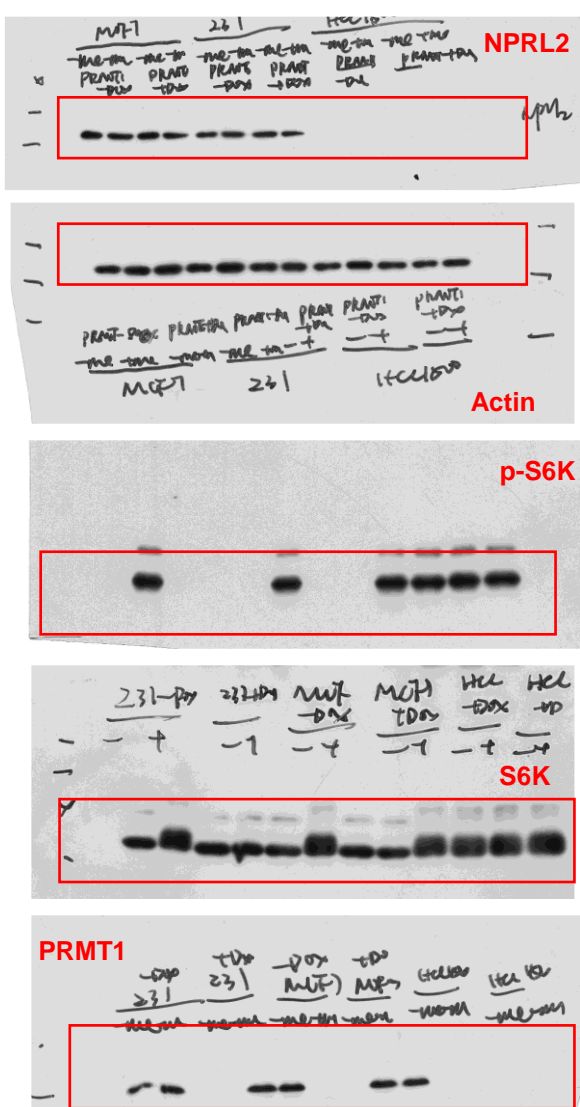

Figure. S1M

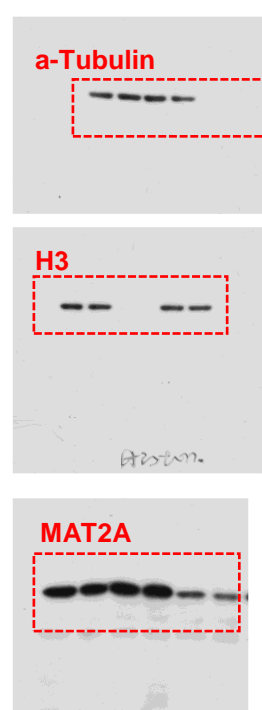

Figure. S1O

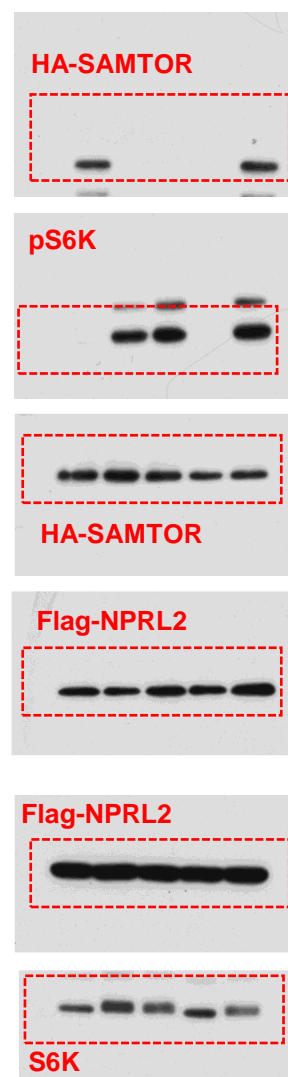

Figure. S1P

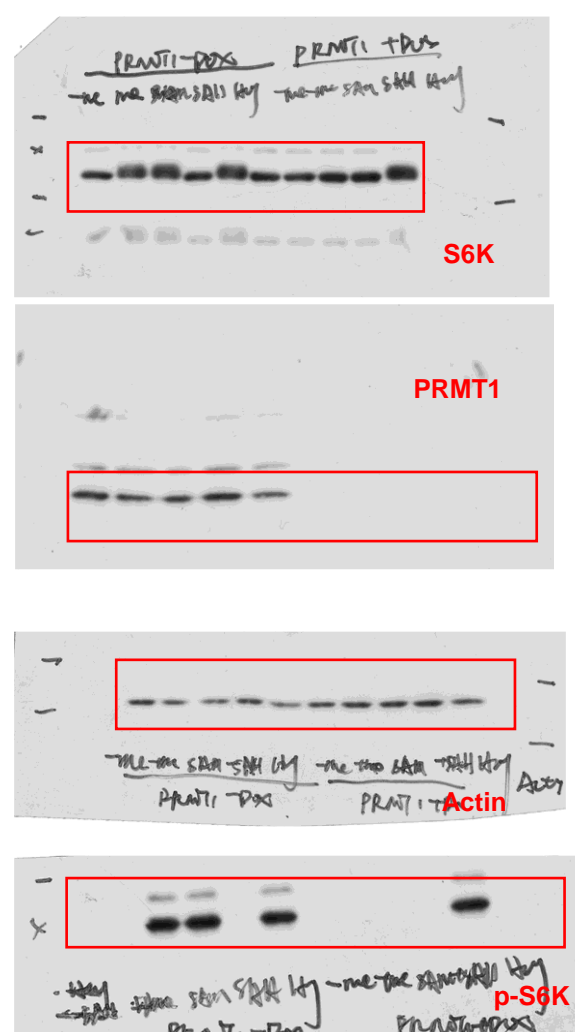

Figure. S1R

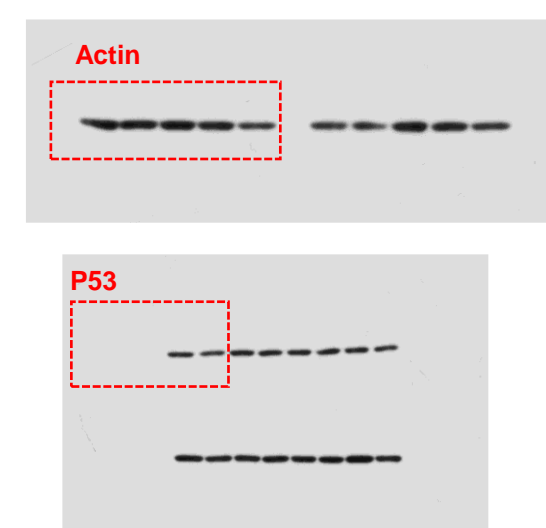

Figure. S2A

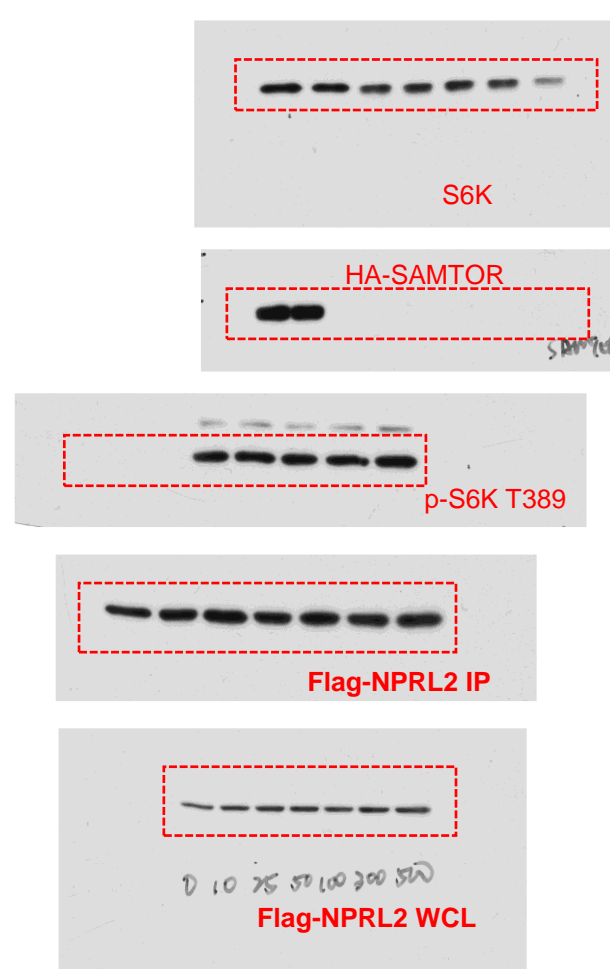

Figure. S2E

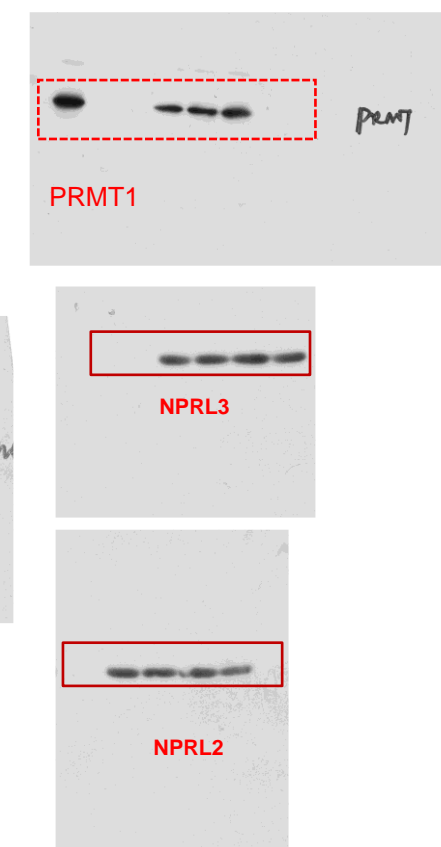

Figure. S2F

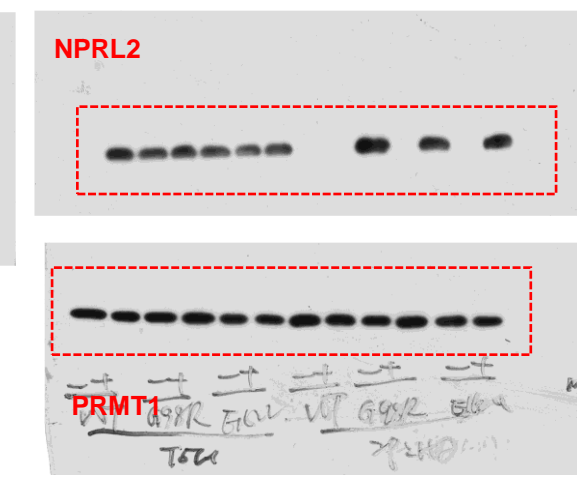

Figure. S2G

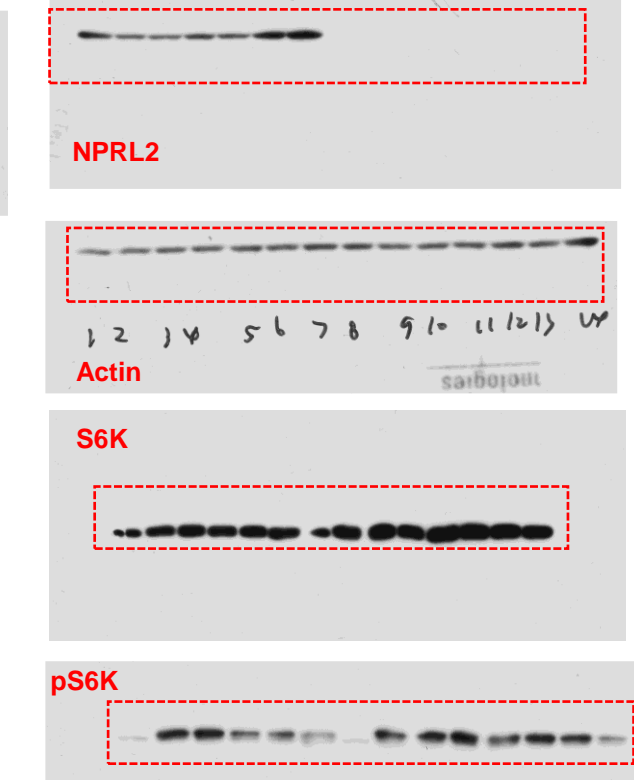

Figure. S2H

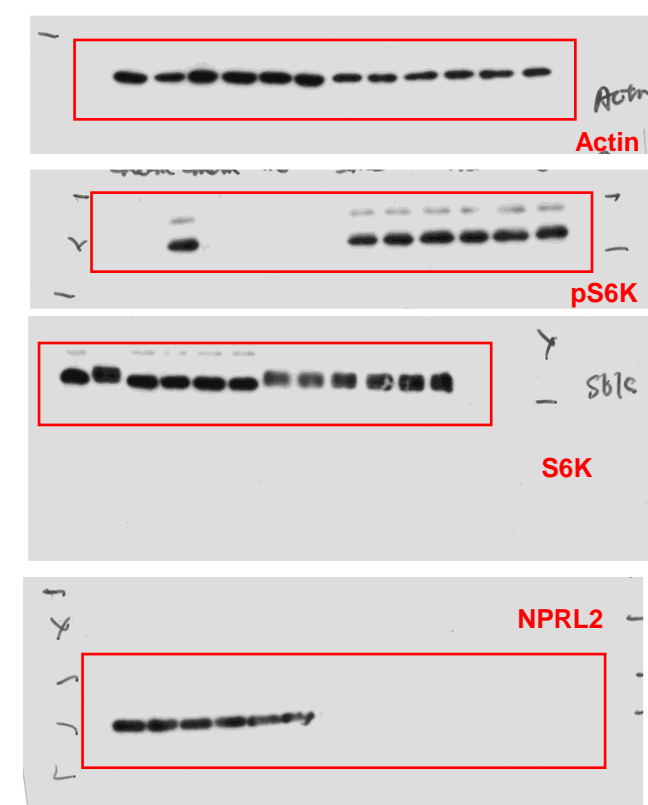

Figure. S2I

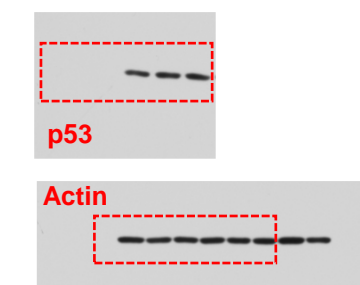

Figure. S2k

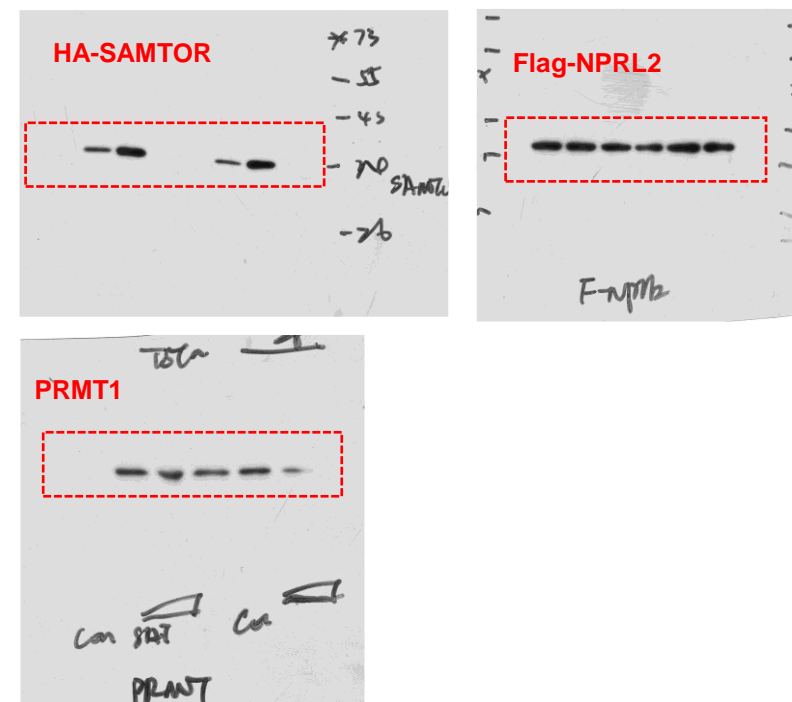

Figure. S2L

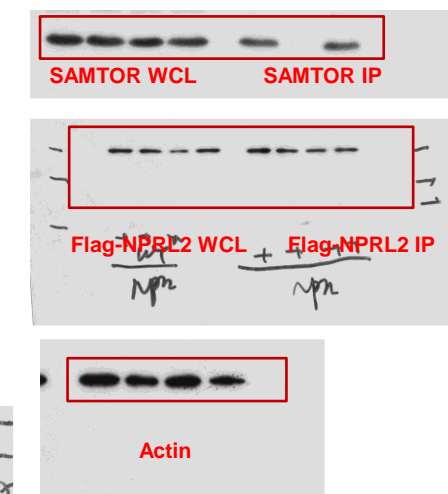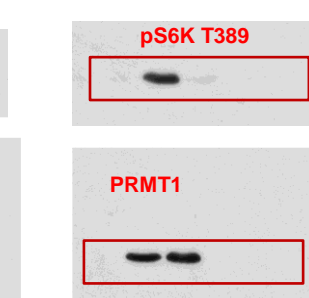

Figure. S2M

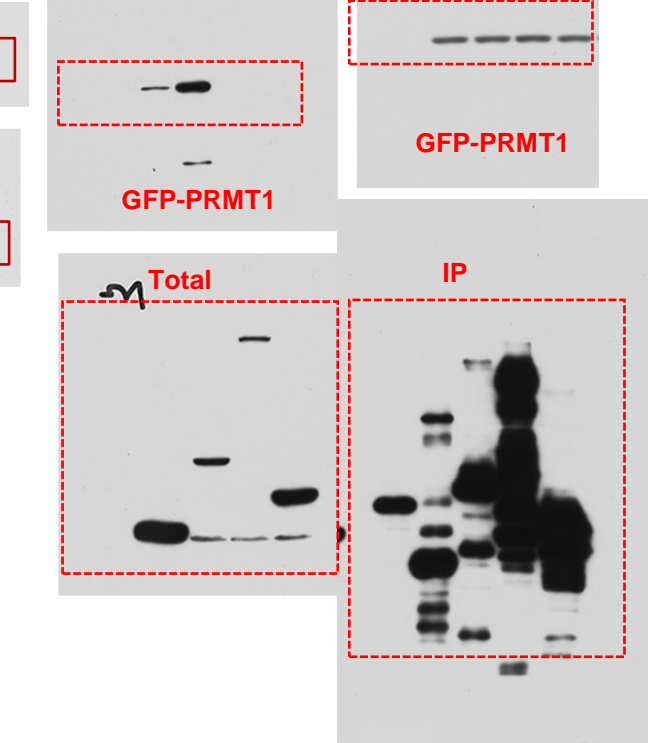

Figure. S2N

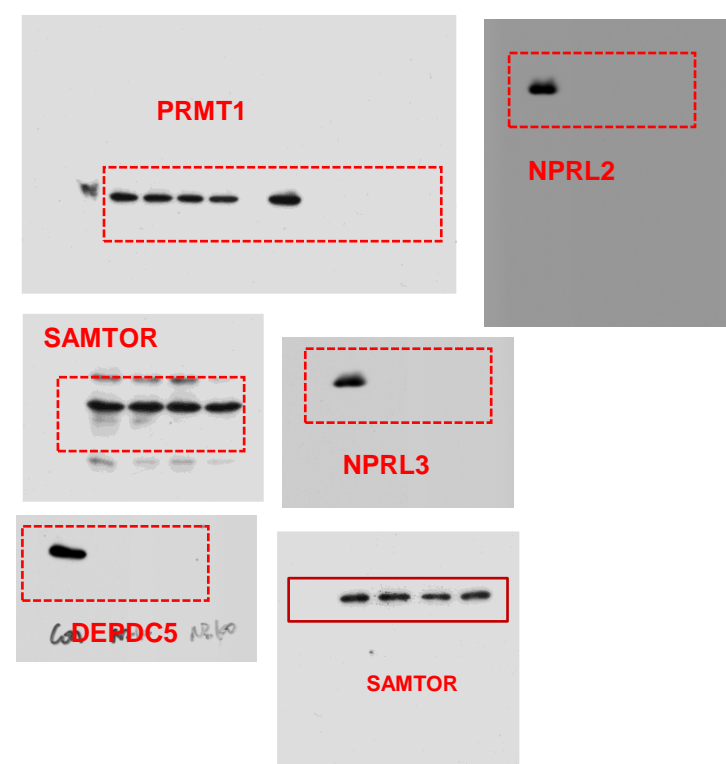

Figure. S2P

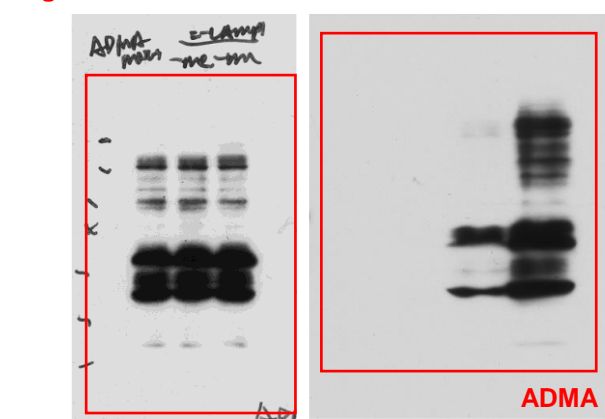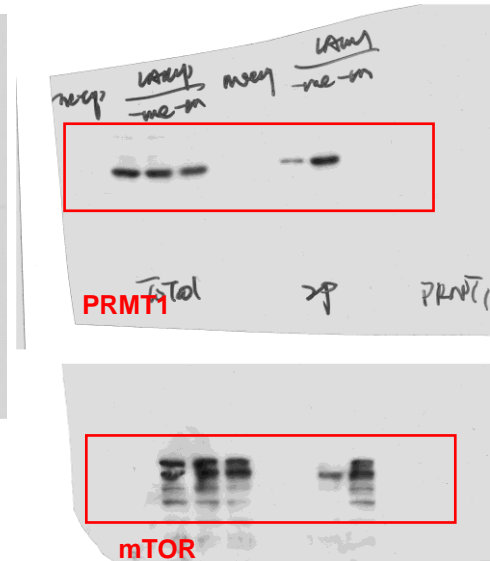

Figure. S2P

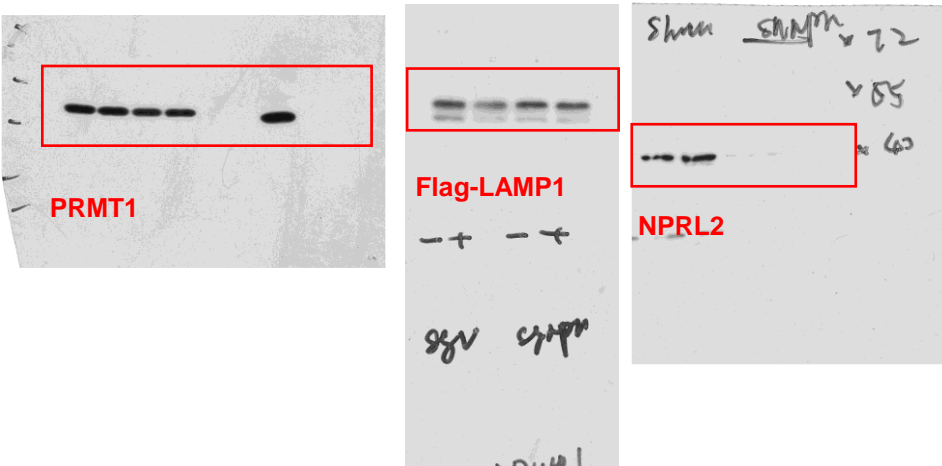

Figure. S2R

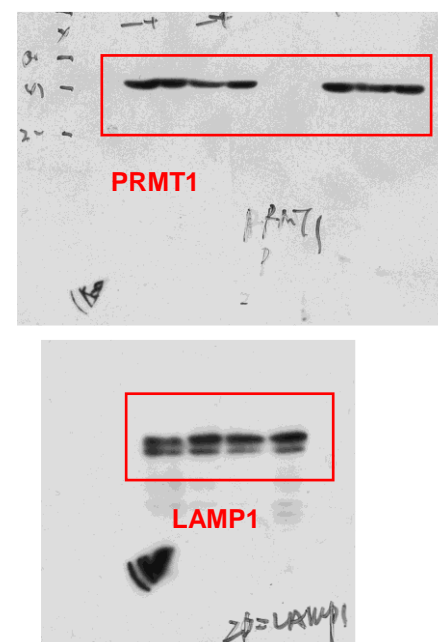

Figure. S2S

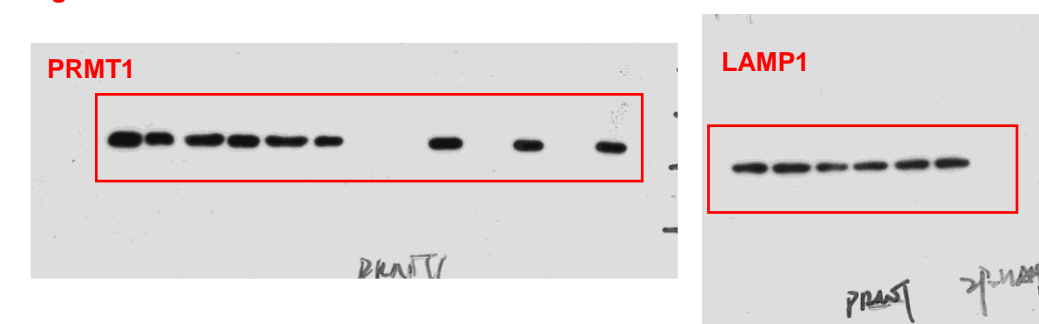



Figure. S3D

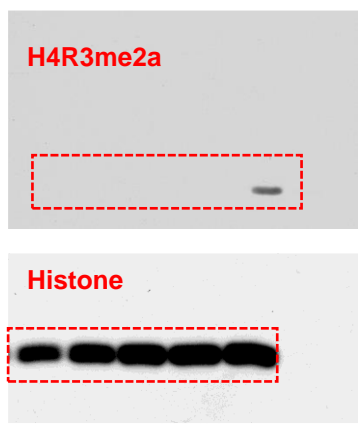

Figure. S3E

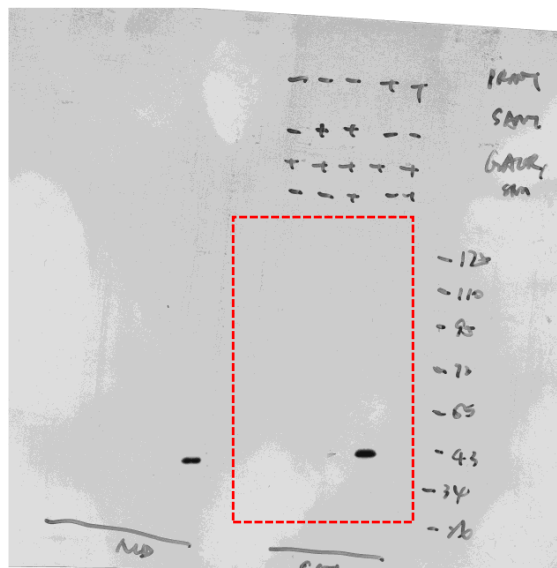

Figure. S3F

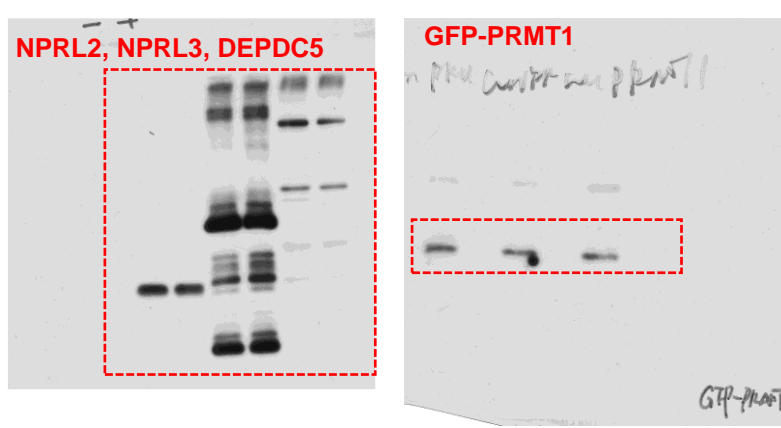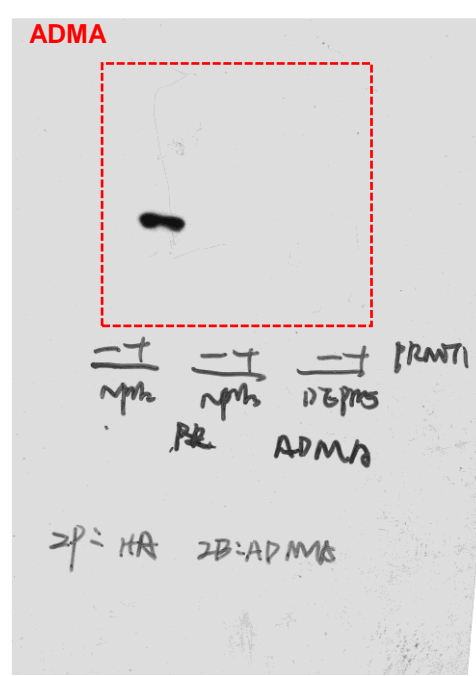

Figure. S3L

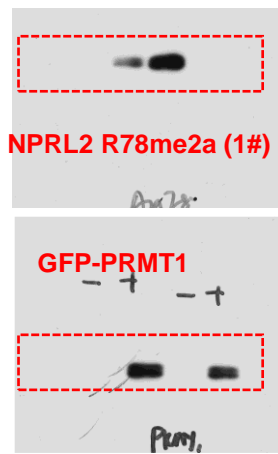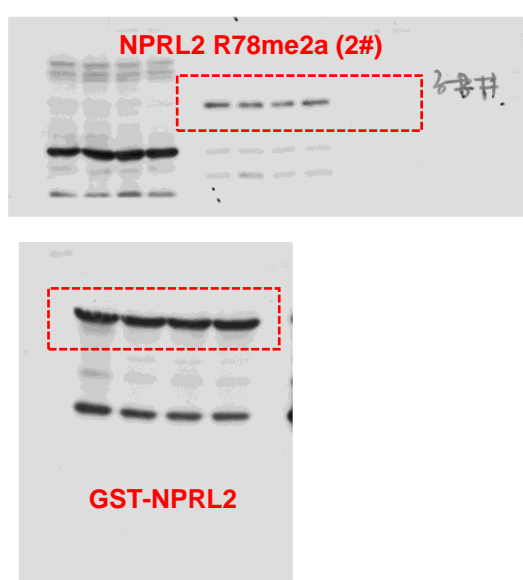

Figure. S3M

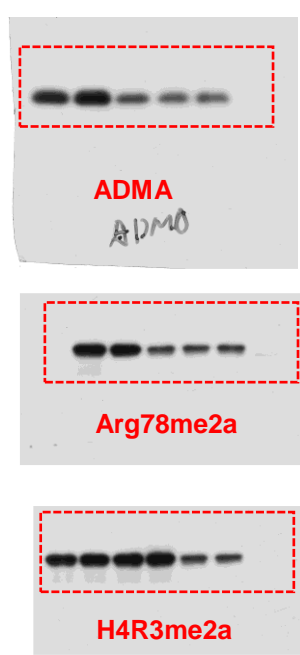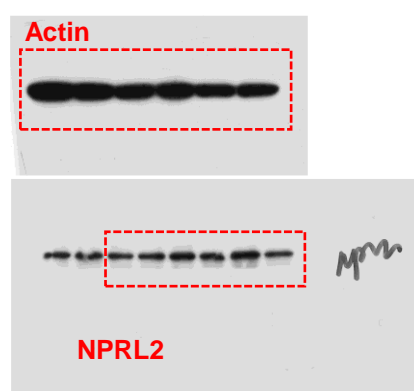

Figure. S3N

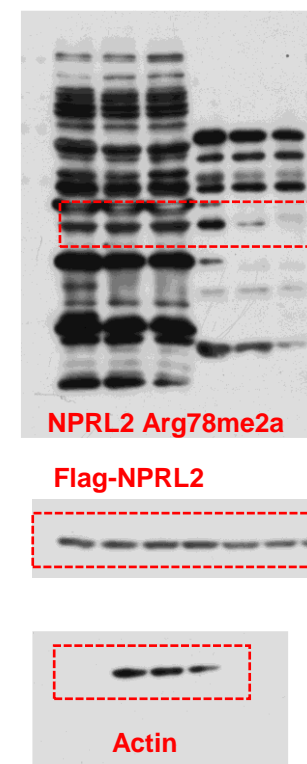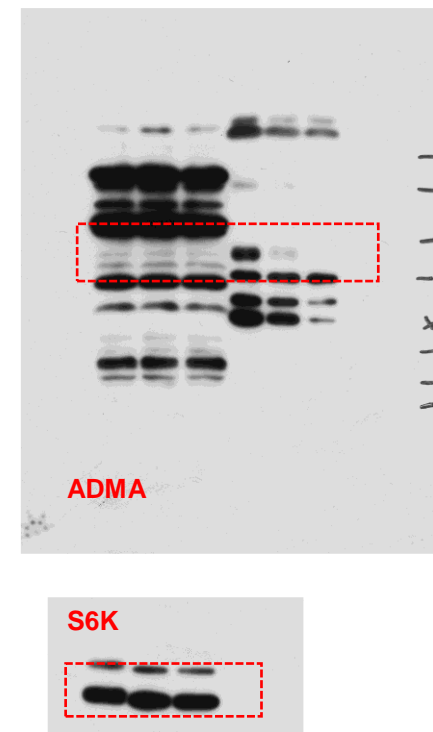

Figure. S3O

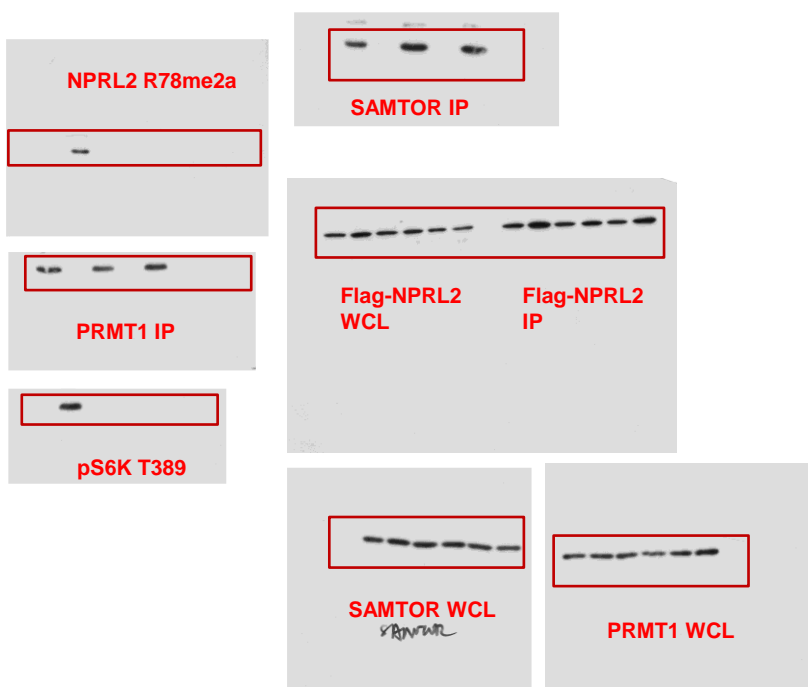

Figure. S3P

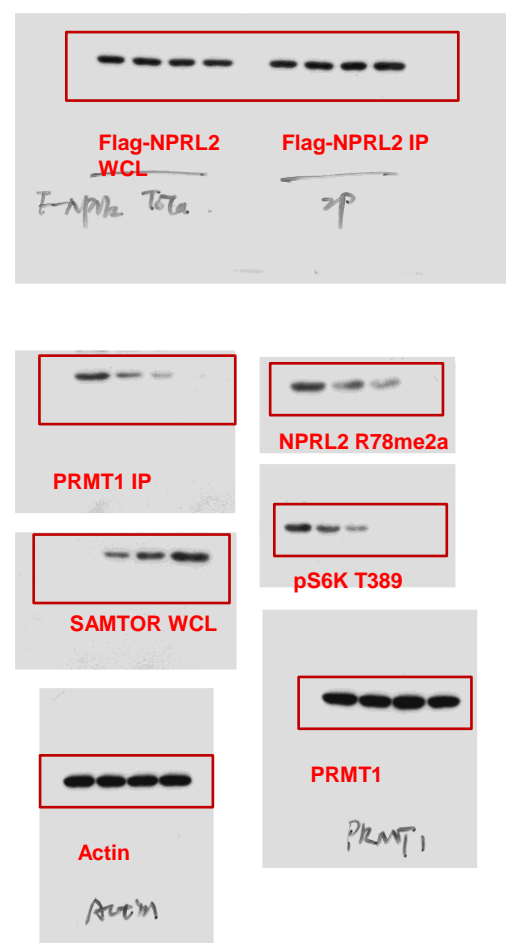

Figure. S4A

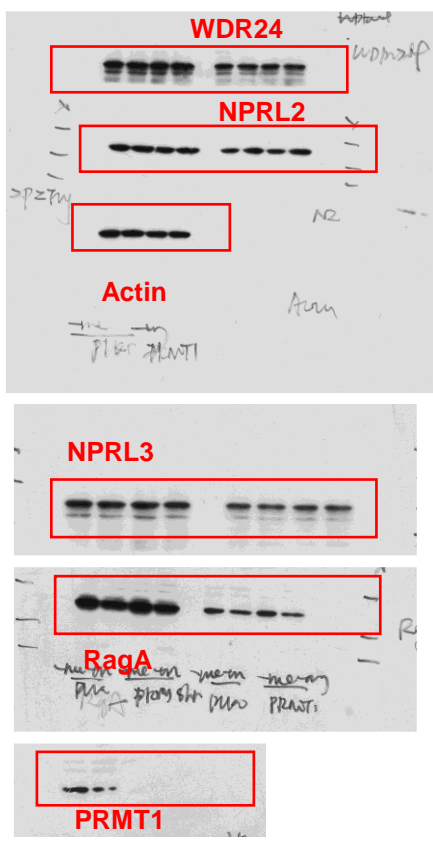

Figure. S4G

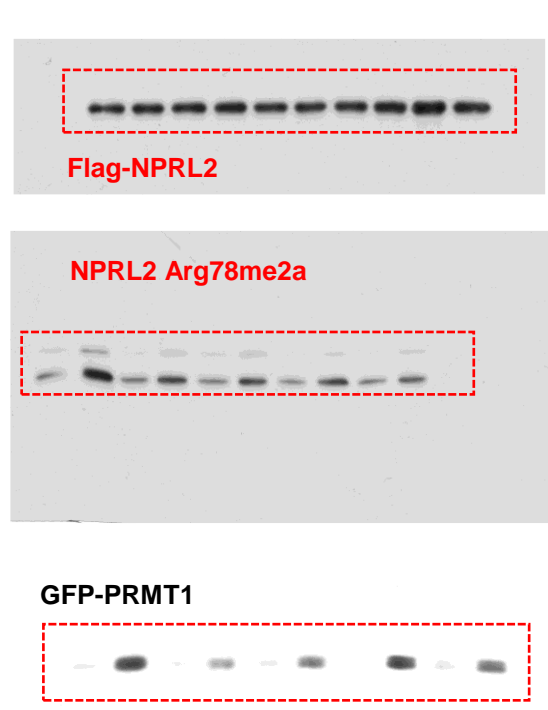

Figure. S4H

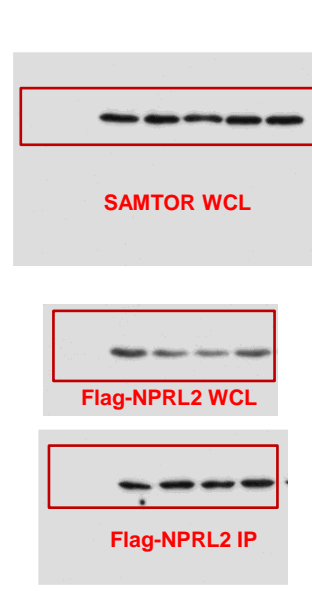

Figure. S4J

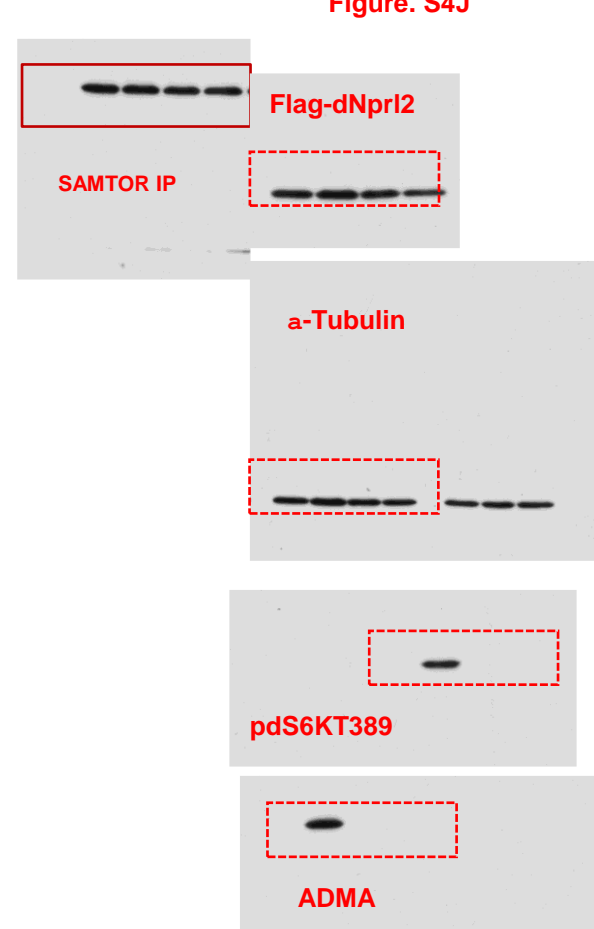

Figure. S4K

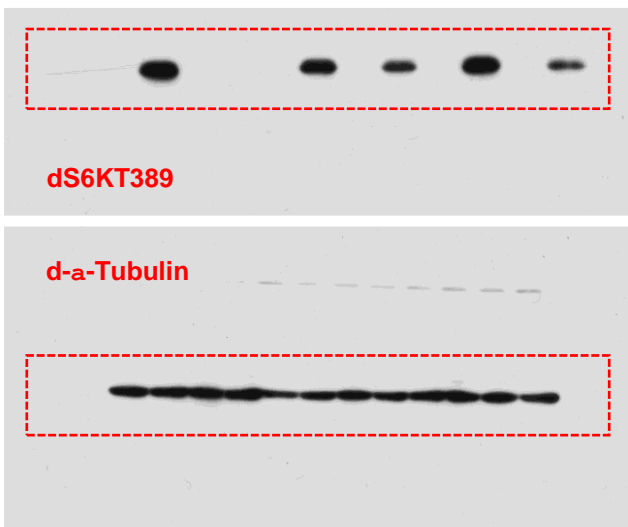

Figure. S4M

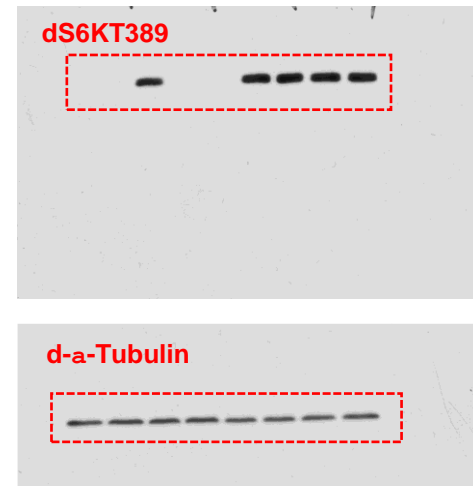

Figure. S4O

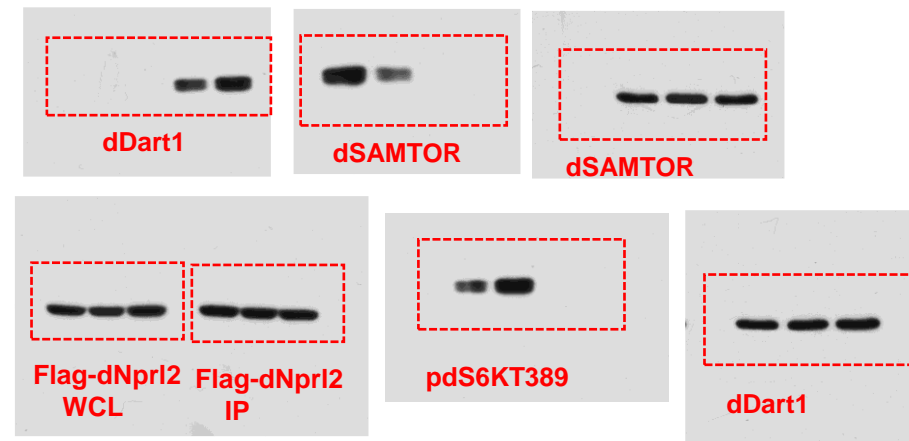

Figure. S4P

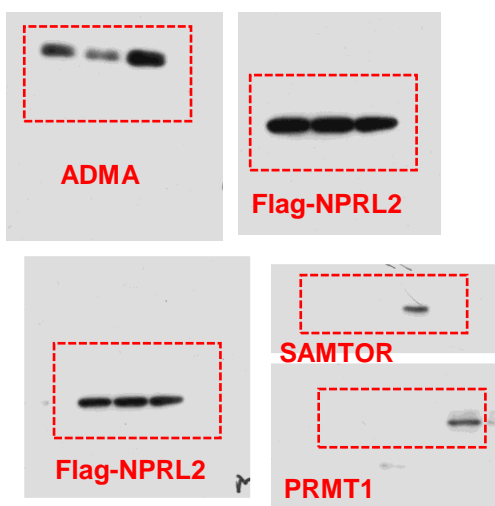

Figure. S4Q

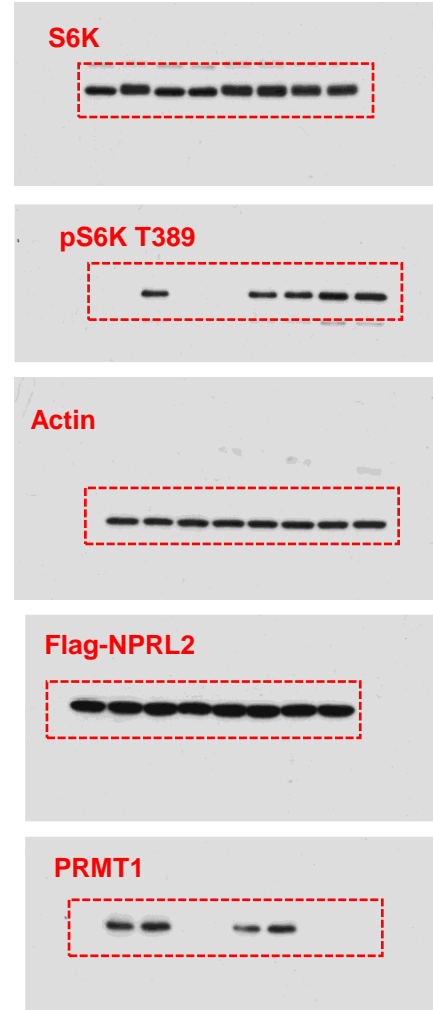

Figure. S4S

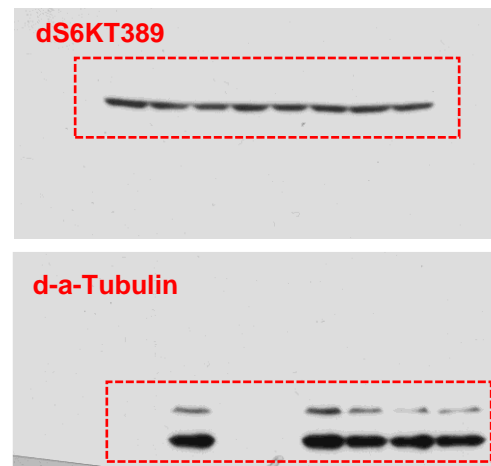

Figure. S5A

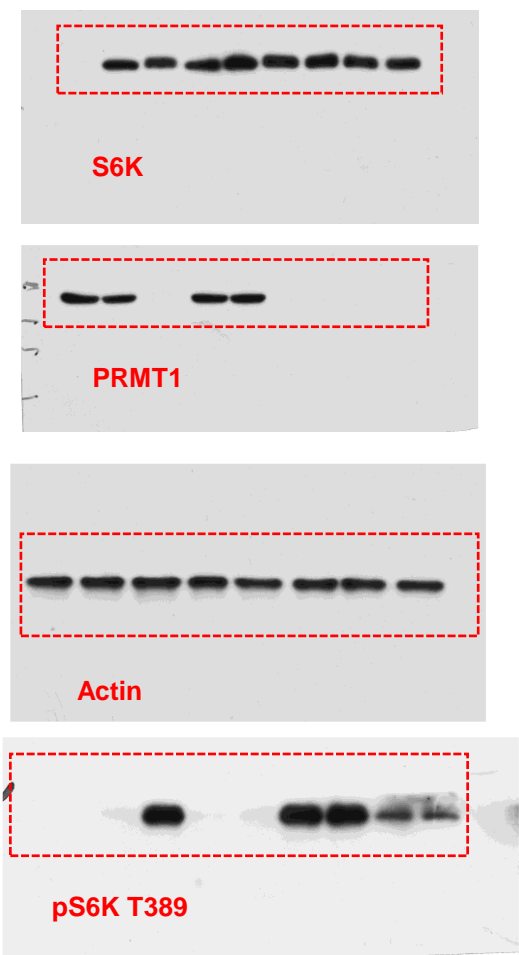

Figure. S5B

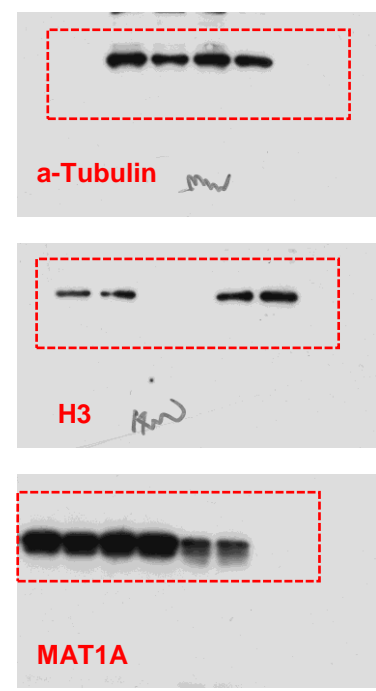

Figure. S5C

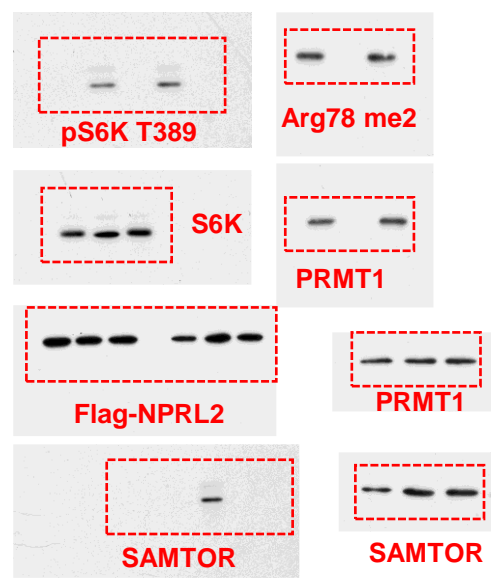

Figure. S5D

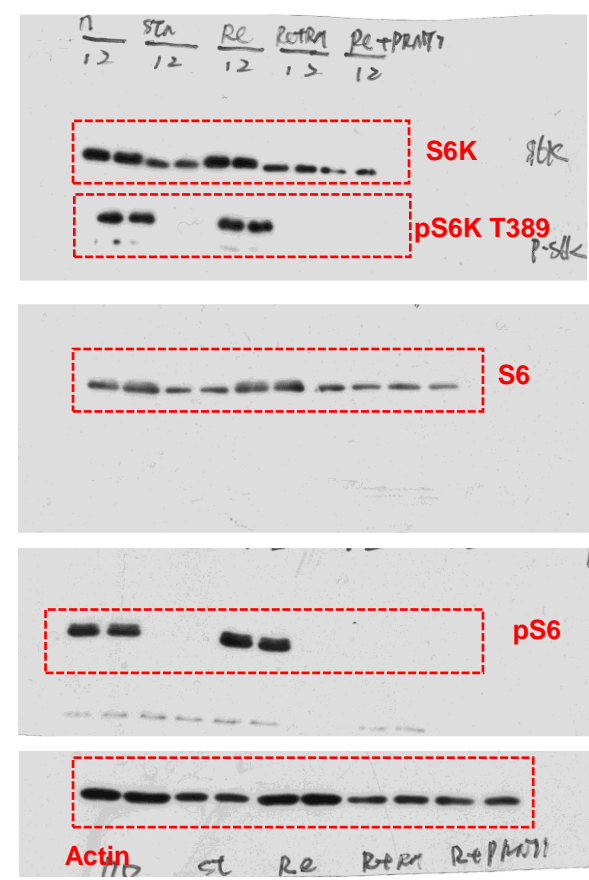

Figure. S5I

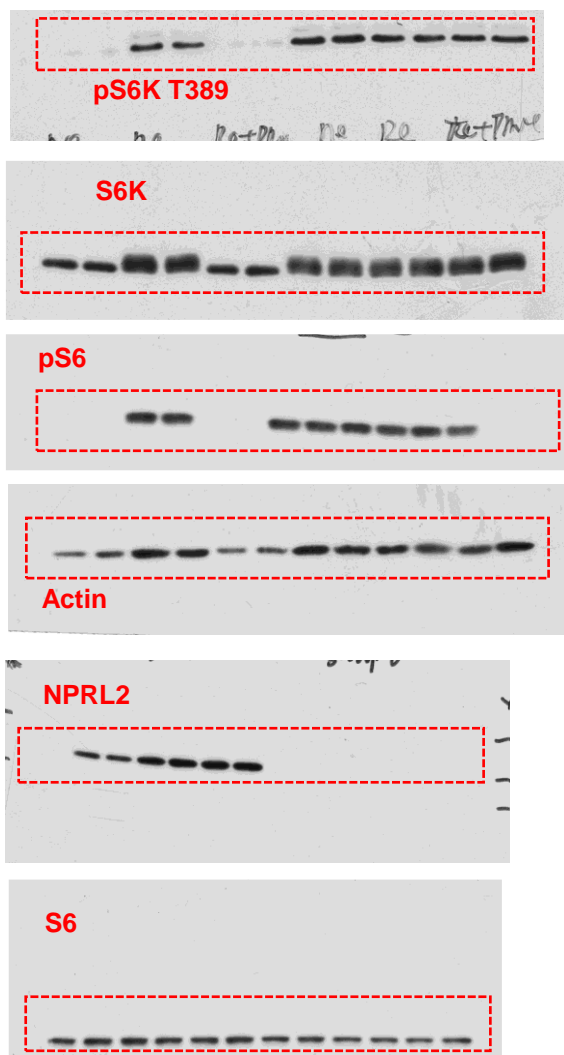

Figure. S5M

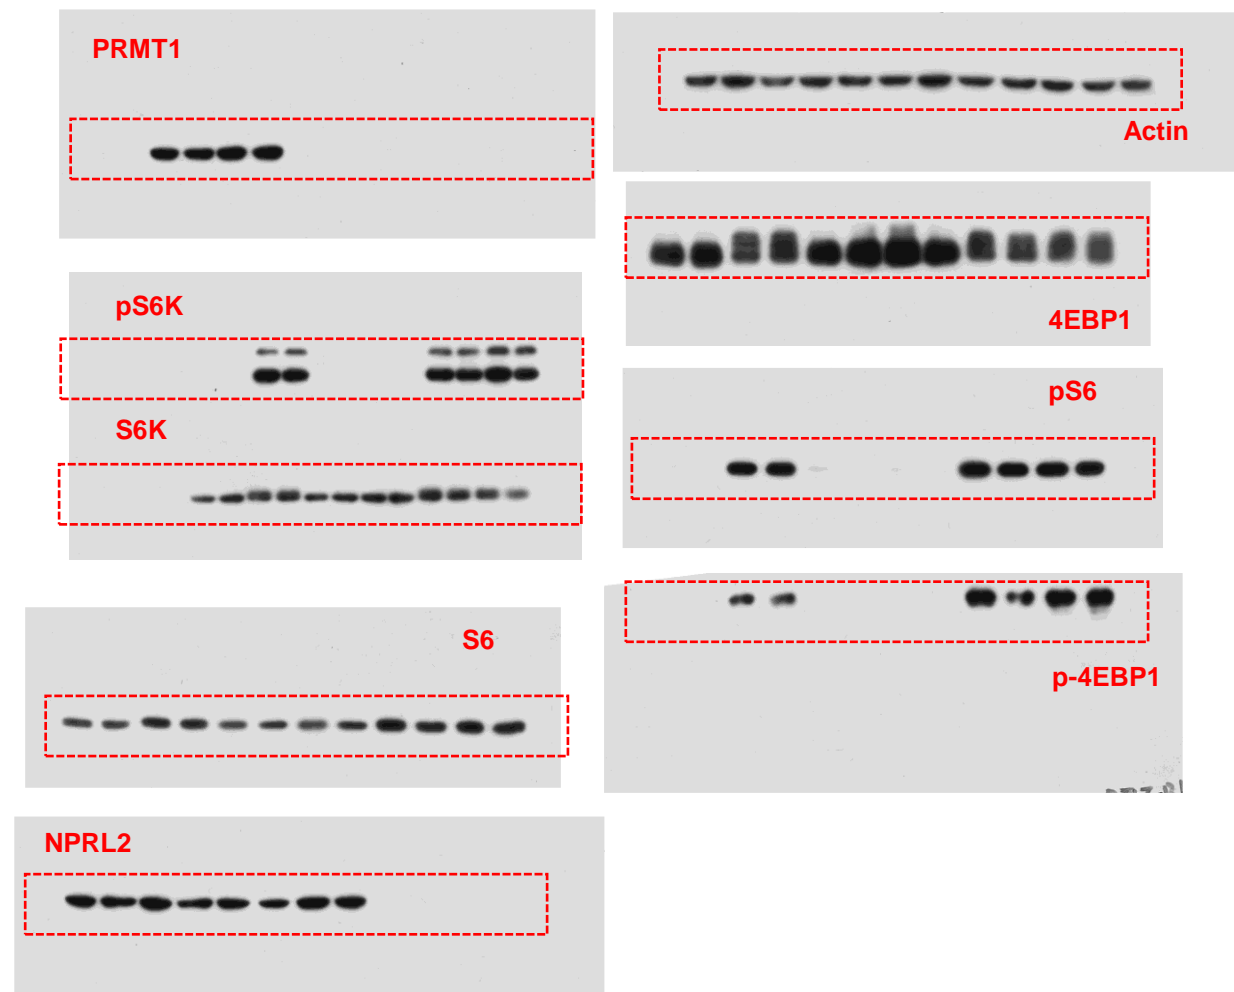

Fig.S5

Figure. S6D

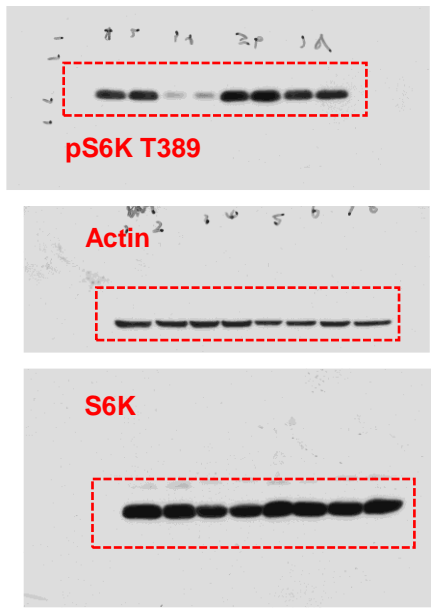

Figure. S6N

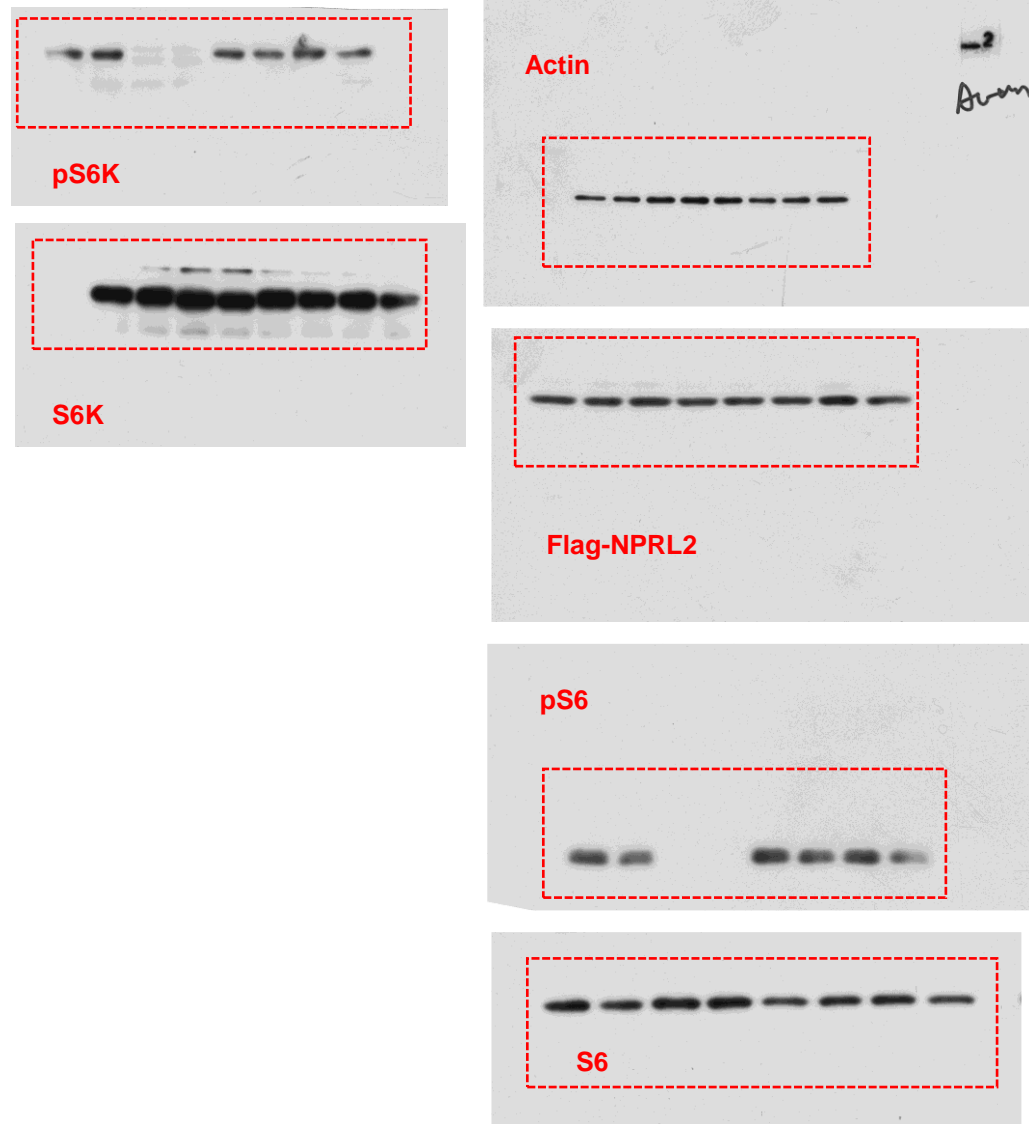

Figure. S6T

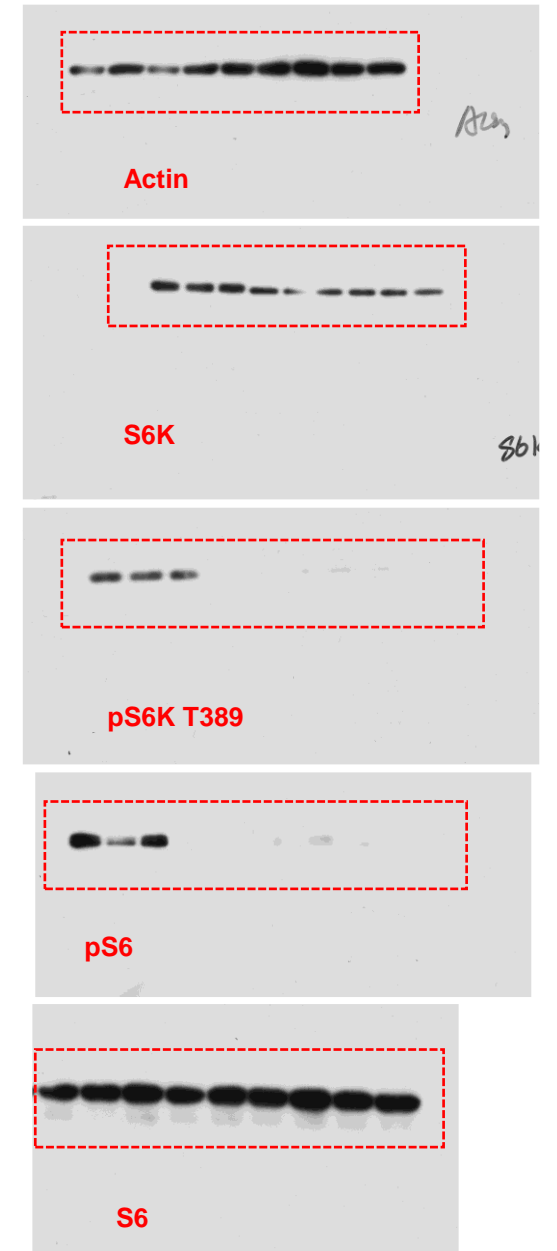

Fig.S6
